# Supplementary material
Source: ML conference proceedings conference paper supplement (https://openreview.net/forum?id=fk5ePN7YCS)
Supplement: supplementary_material [file attachment]

## A UNSTRUCTURED PRUNING NATURALLY REDUCES THE ENTROPY

Let us assume the input  $x$  for a given neuron is a sequence of random variables  $X \sim \mathcal{N}(\mu_X, \sigma_X^2)$ . Similarly, we can assume the  $N$  parameters populating such neuron, for a large  $N$  limit, follow as well a Gaussian distribution, and we model it as  $W \sim \mathcal{N}(\mu_W, \sigma_W^2)$ . [These assumptions are empirically validated in Appendix B](#). Let us assume we apply a magnitude-based pruning mask to the neuron’s parameters, where we apply some threshold  $t$ . As such, we obtain a modified distribution for the layer’s parameters:

$$f_{\widehat{W}}(w, t) = \begin{cases} \frac{1}{\sigma_W \sqrt{2\pi}} \exp \left[ -\frac{1}{2} \left( \frac{w - \mu_W}{\sigma_W} \right)^2 \right] & |w| > t \\ \zeta(t) \delta(w) & |w| \leq t, \end{cases} \quad (11)$$

where

$$\zeta(t) = \frac{1}{2} \left[ \operatorname{erf} \left( \frac{t - \mu_W}{\sigma_W \sqrt{2}} \right) - \operatorname{erf} \left( \frac{-t - \mu_W}{\sigma_W \sqrt{2}} \right) \right] \quad (12)$$

is the fraction of parameters pruned, or *pruning rate*,  $\delta$  is the Dirac delta and  $\operatorname{erf}$  is the error function. Fig. 2a displays an example of distribution when applying magnitude pruning having threshold  $t$  against the original distribution. Under the assumption of independent-centered distributions having a unitary variance, we can obtain the distribution for the pre-activation  $z$  (resulting from the product of the weights and the input, modeled through the random variable  $Z$ ), according to the result obtained by Craig (1936); Seijas-Macías and Oliveira (2012), follows

$$f_Z(z, t) = \frac{1}{\pi} K_0 \left( \left| \frac{1}{q(t)} \cdot z \right| \right), \quad (13)$$

where

$$q(t) = 1 - \operatorname{erf} \left( \frac{t}{\sqrt{2}} \right) \quad (14)$$

and  $K_n$  is the  $n$ -th order modified Bessel function of the second kind. We can observe, from Fig. 2b, how  $f_Z$  is affected by increasing the thresholding  $t$ . Now, let us assume the activation function of such a neuron is a rectifier function, and we are interested in observing what is the probability of the post-activation output being in the linear region: we are interested in measuring

$$p[Z > \epsilon] = \frac{1}{\pi} \int_{\epsilon}^{+\infty} K_0 \left( \left| \frac{1}{q(t)} \cdot z \right| \right) dz = \frac{1}{2} \left[ 1 - I \left( \frac{\epsilon}{q(t)} \right) \right], \quad (15)$$

where

$$I(x) = x[L_{-1}(x)K_0(x) + L_0(x)K_1(x)], \quad (16)$$

$L_n$  is the  $n$ -th order modified Struve function, and  $\epsilon$  is a positive small value. From this, we can easily obtain the complementary probability  $p[Z \leq \epsilon]$  and for instance calculate the entropy between the two States.

Fig. 2c displays the entropy as a function of the thresholding parameter  $t$ : as we observe, the entropy decreases given that the threshold increases: through unstructured pruning, the neuron’s output entropy is naturally minimized when employing rectified activations, even in the oversimplified case here treated.

## B PRACTICAL SANITY CHECKS ON GAUSSIAN ASSUMPTIONS

Our derivation is based on the assumption that the weights of a layer and the inputs for its corresponding rectifier activation are Gaussian distributed. We validate here this assumption empirically. Fig 4, 6, 8, 10, 12 show the weights distribution for each rectifier activated layer for all the models employed in our experiments. Moreover, Fig 5, 7, 9, 11, 13 show the input distribution for each rectifier layer for each model used in our experiments. Inputs from CIFAR-10 are used for ResNet-18, Swin-T, and MobileNet-V2 models, while inputs from QNLI are employed for BERT and RoBERTa models. It appears that the weights and the inputs of the corresponding layers are following a Gaussian distribution.

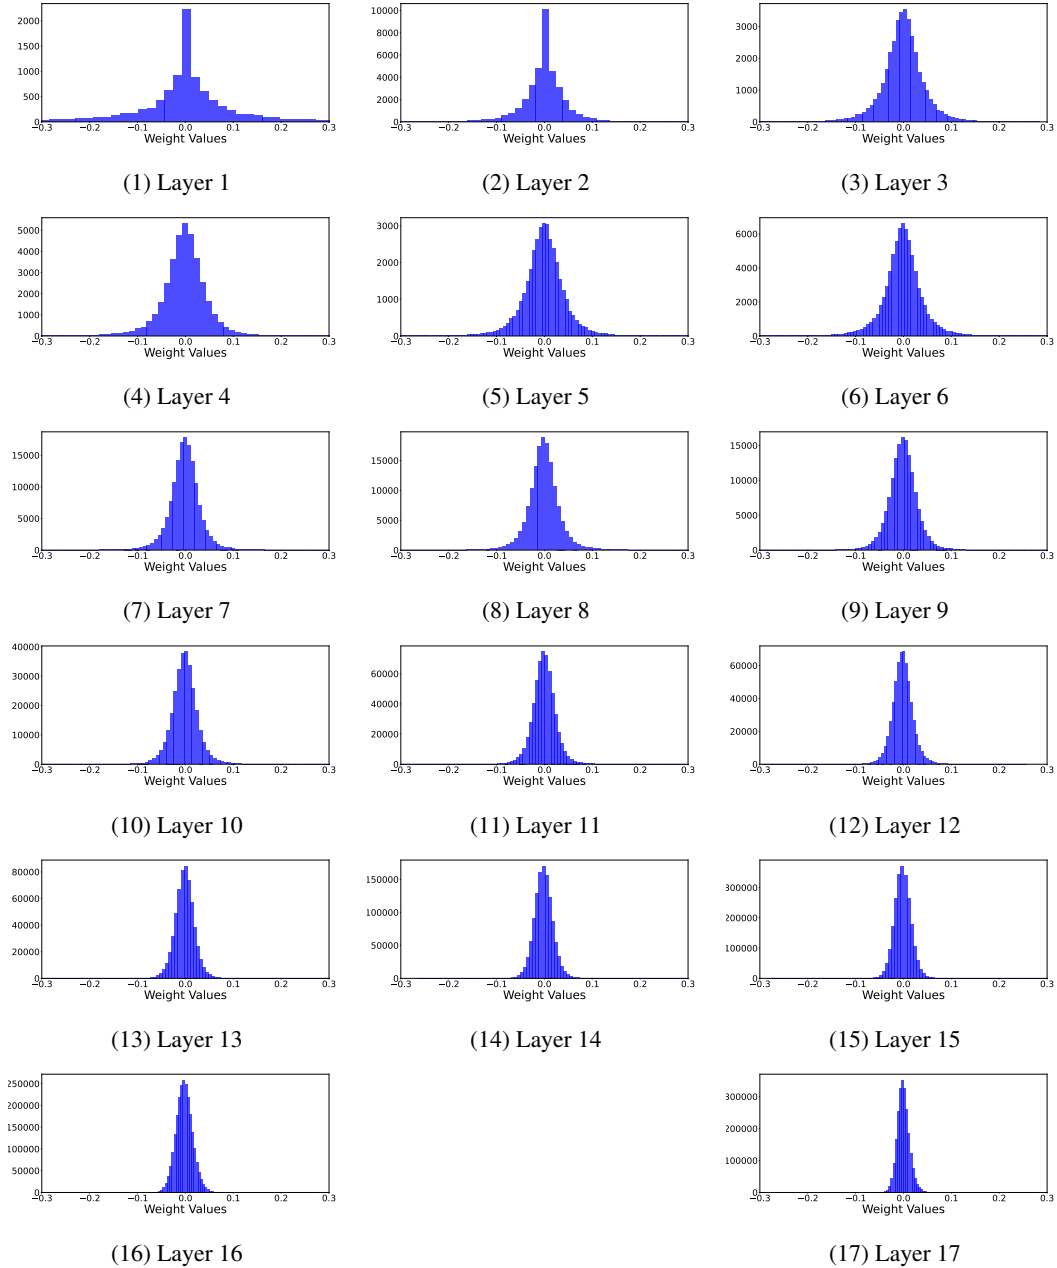

Figure 4: Weights distribution of each layer in ResNet-18

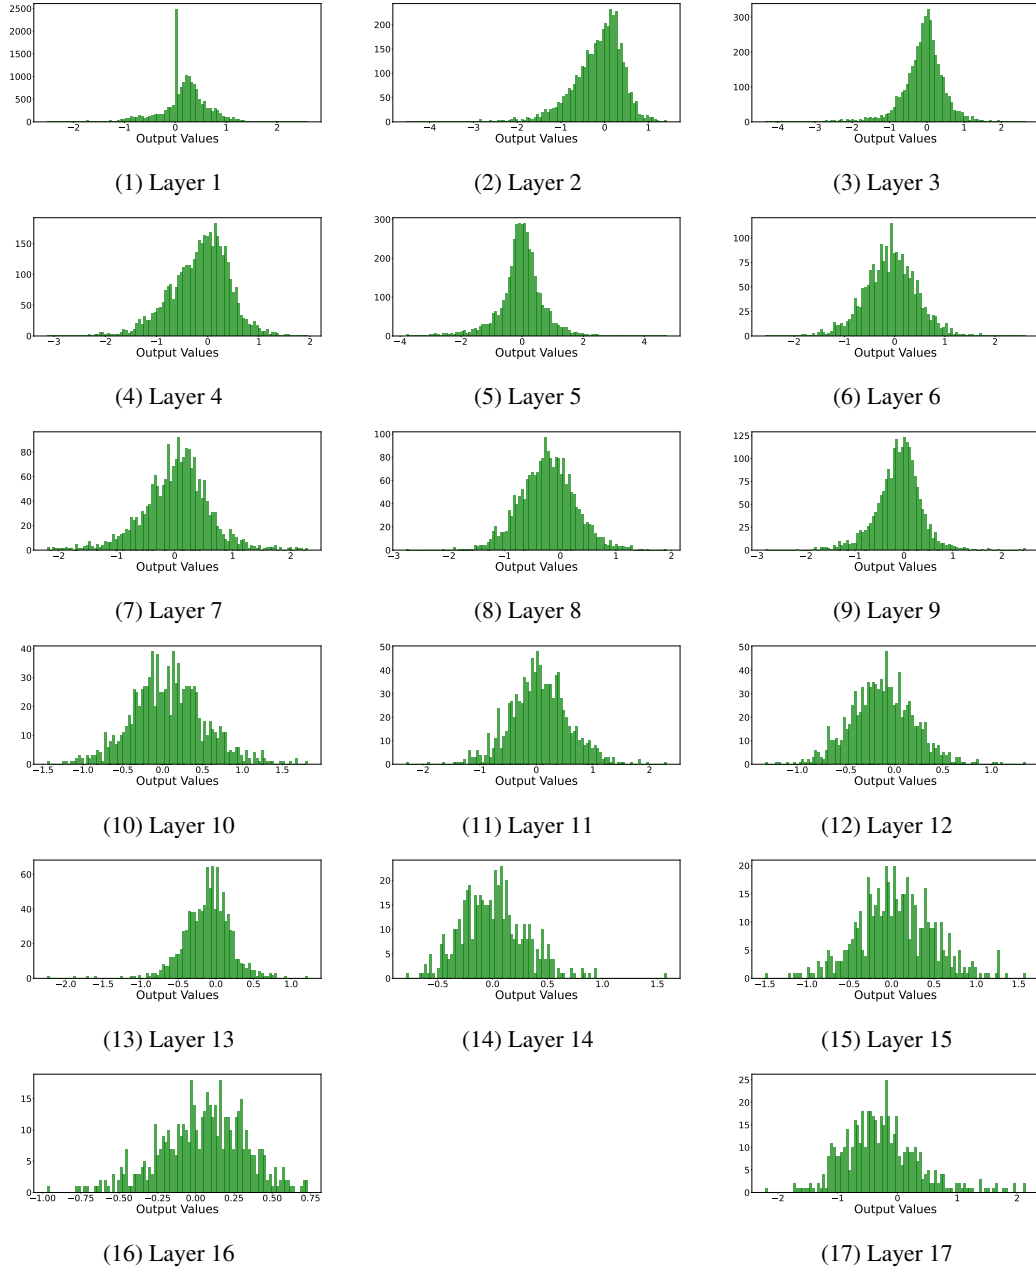

Figure 5: Input distribution of each layer in ResNet-18

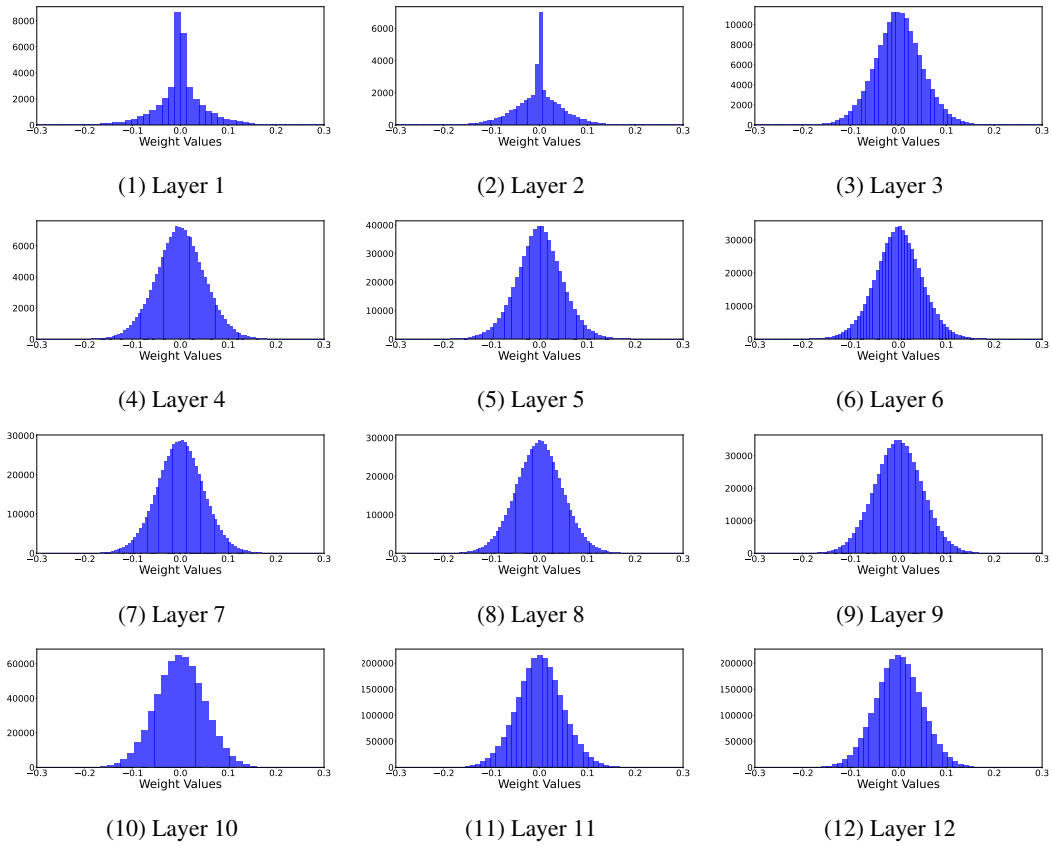

Figure 6: Weights distribution of each layer in Swin-T

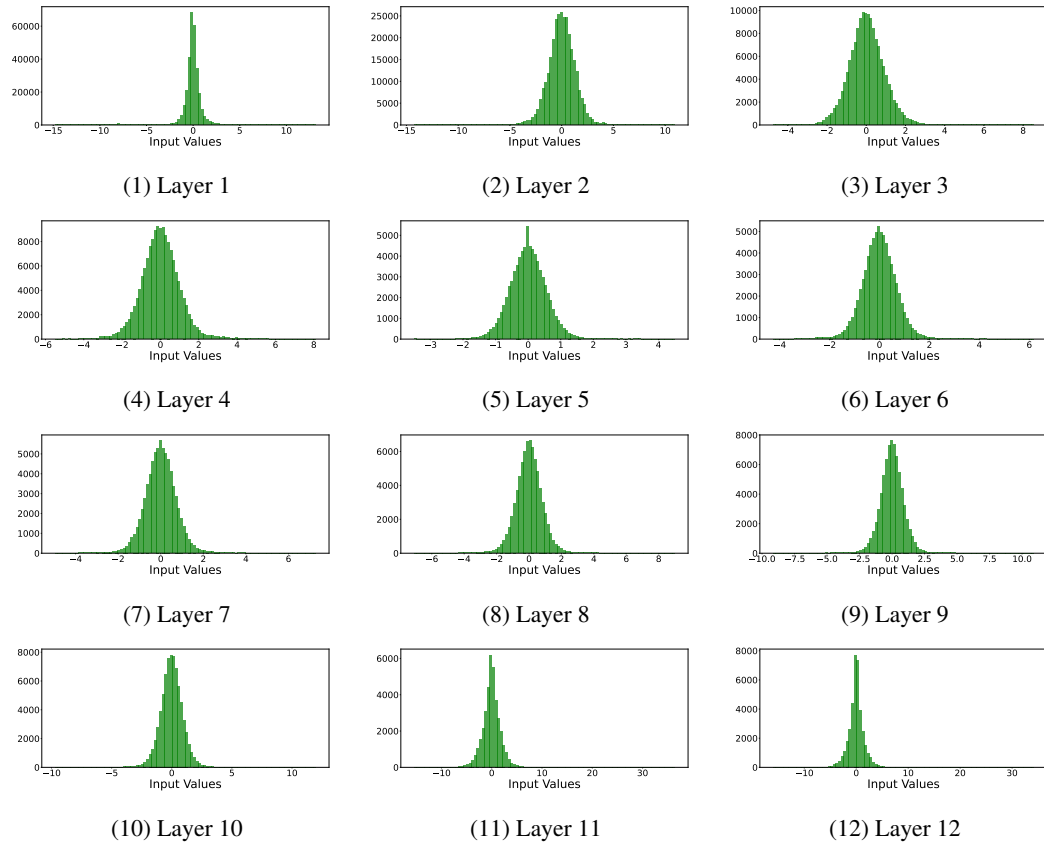

Figure 7: Input distribution of each layer in Swin-T

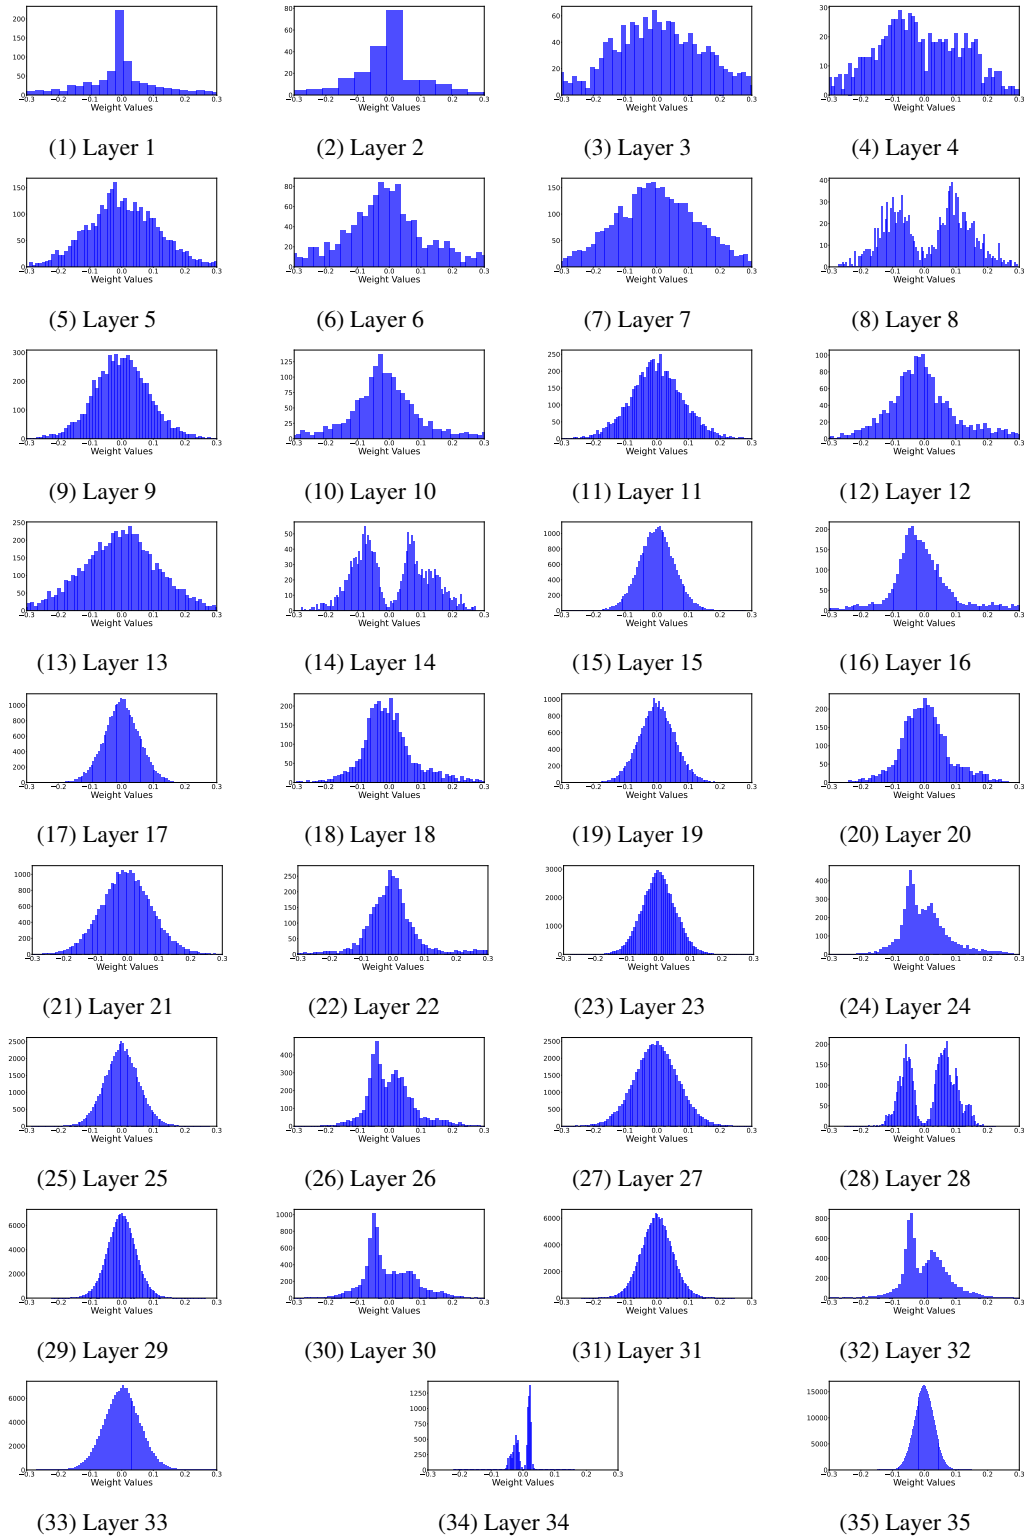

Figure 8: Weights distribution of each layer in MobileNet

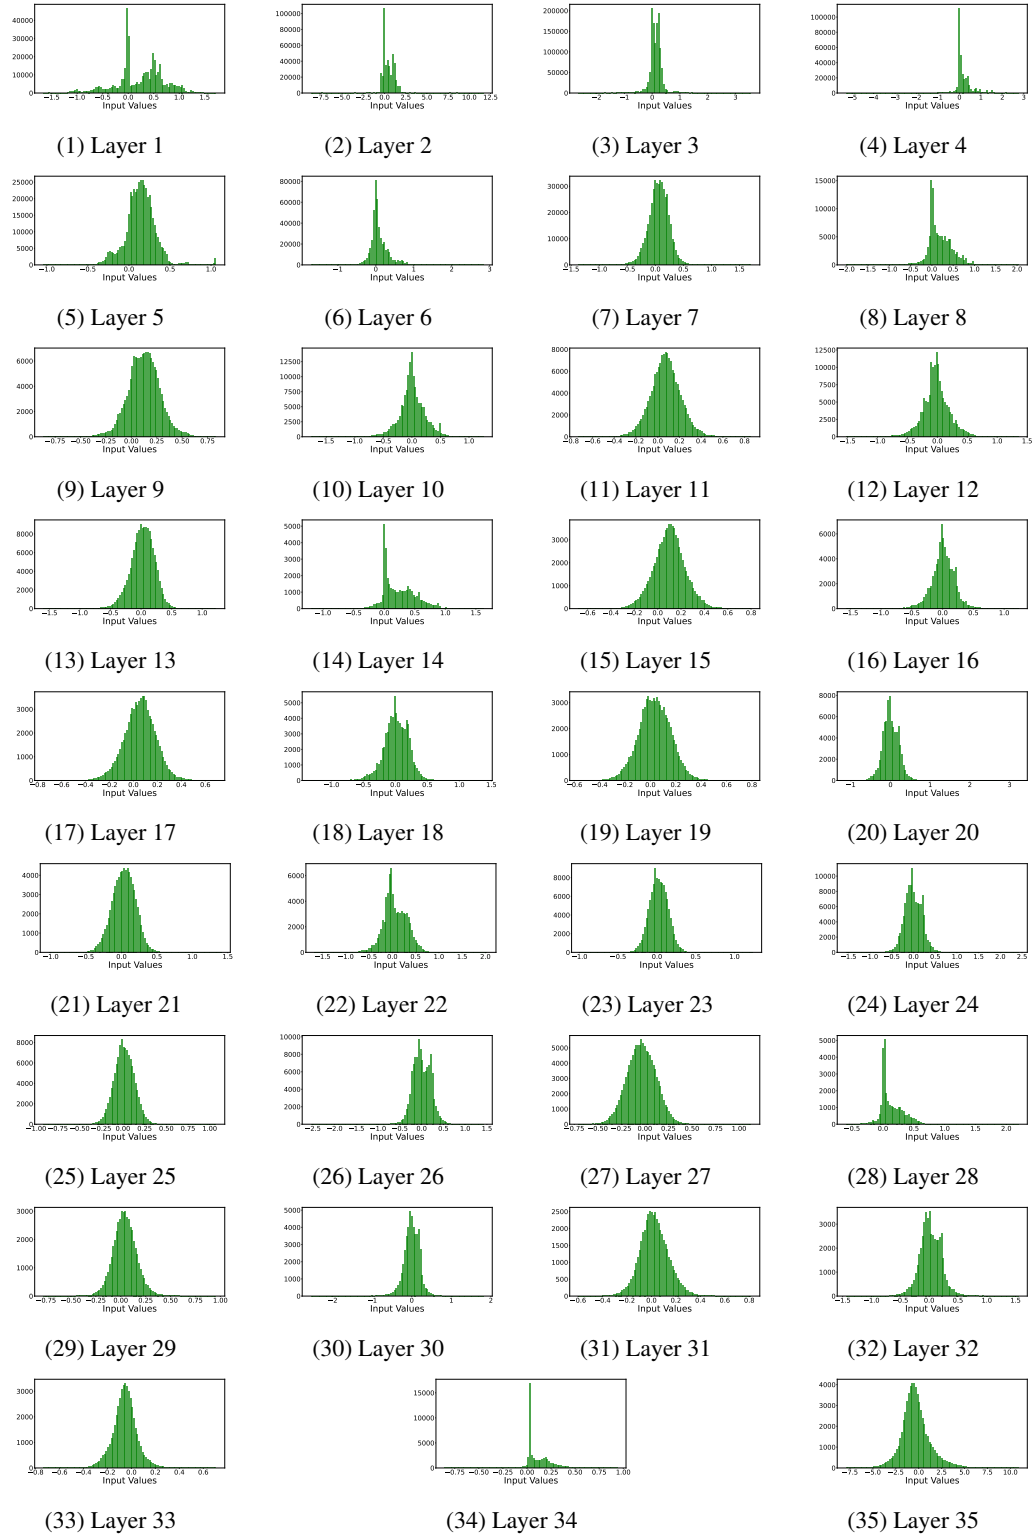

Figure 9: Input distribution of each layer in MobileNet

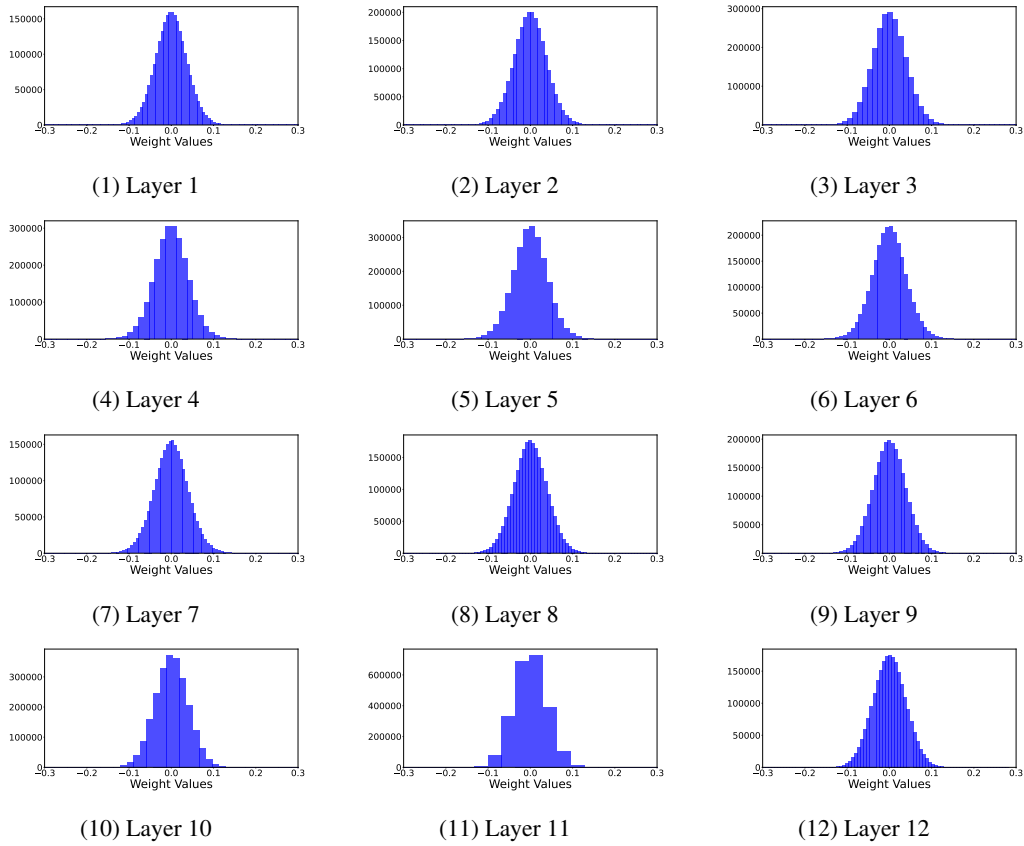

Figure 10: Weights distribution of each layer in BERT



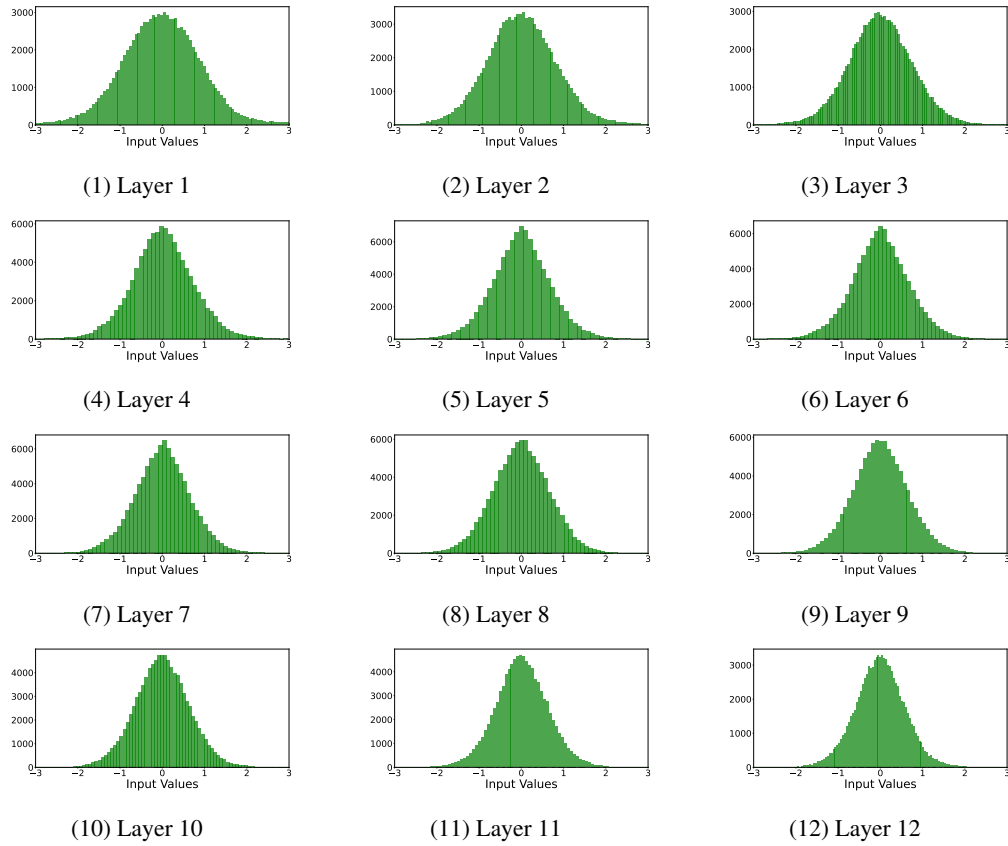

Figure 11: Input distribution of each layer in BERT

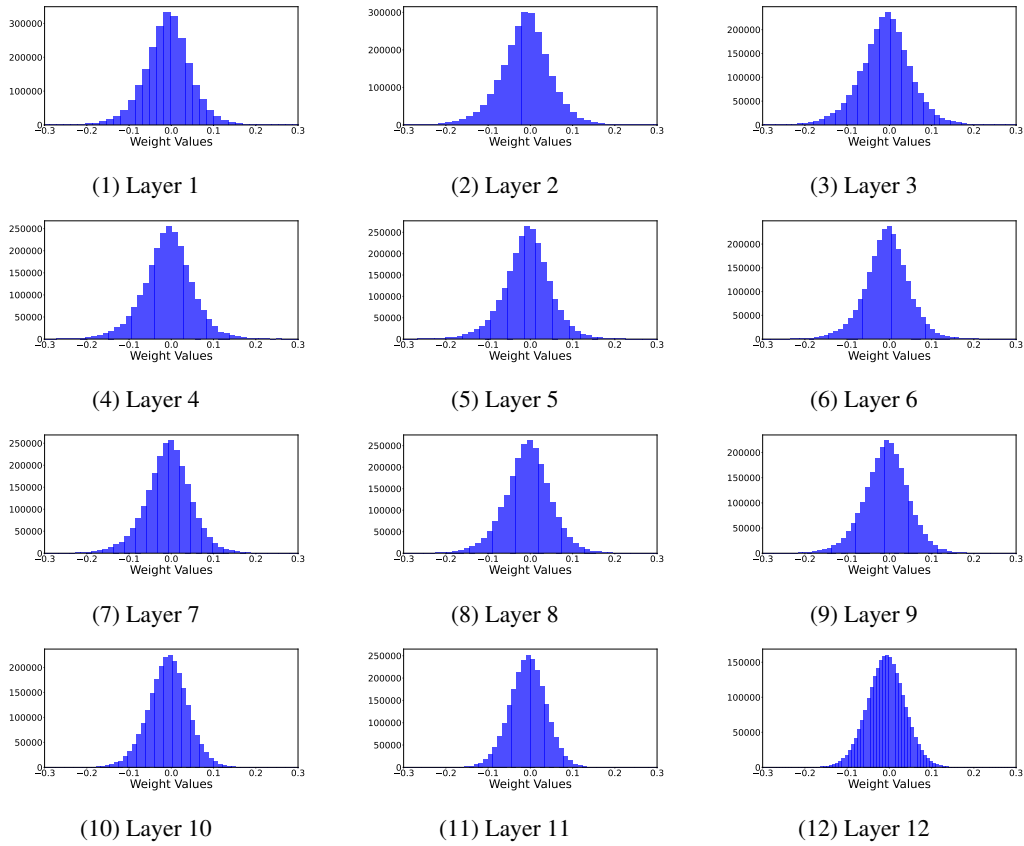

Figure 12: Weights distribution of each layer in RoBERTa

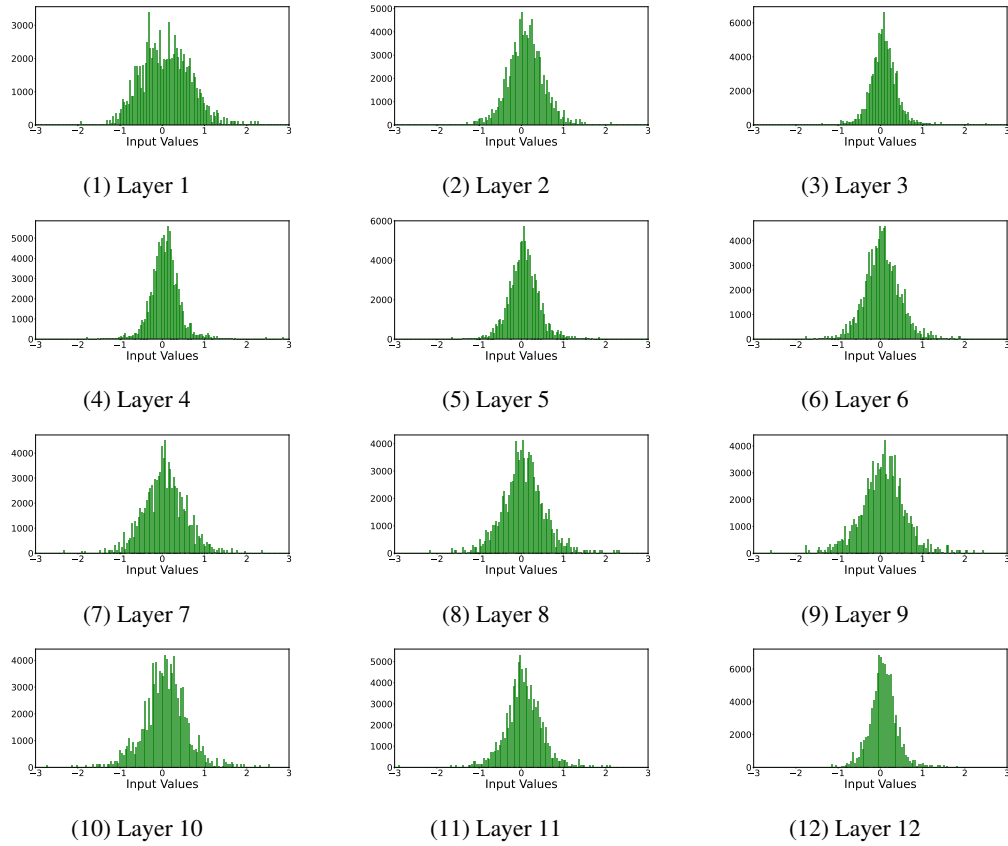

Figure 13: Input distribution of each layer in RoBERTa

**Algorithm 2** Function `Weights_to_prune`


---

```

1: function WEIGHTS_TO_PRUNE( $L, \hat{\mathcal{H}}, \|\mathbf{w}\|_0^{\text{PRUNED}}, \mathcal{D}$ )
2:   for  $l \in L$  do
3:      $\mathcal{I}_l \leftarrow \frac{1}{N_l} \sum_{i=1}^{N_l} \hat{\mathcal{H}}_{l,i} \cdot \frac{1}{\|\mathbf{w}_{l,i}\|_0} |\mathbf{w}_{l,i}|$ 
4:      $\mathcal{R}_l \leftarrow \begin{cases} \frac{\sum_{j \in L} \mathcal{I}_j}{\mathcal{I}_l} & \text{if } \mathcal{I}_l \neq 0 \\ 0 & \text{otherwise.} \end{cases}$ 
5:      $\|\mathbf{w}_L\|_0^{\text{pruned}} \leftarrow \|\mathbf{w}\|_0^{\text{pruned}} \cdot \frac{\exp[\mathcal{R}_l]}{\sum_j \exp[\mathcal{R}(j)]}$ 
6:   end for
7:   return  $\|\mathbf{w}_L\|_0^{\text{pruned}}$ 
8: end function

```

---

**C DETAILS ON THE LEARNING STRATEGIES EMPLOYED**

The implementation details used in this paper are presented here.

Alg. 2 is the function we use to calculate the number of parameters to be removed from each layer.

Like in He et al. (2022) setup, for the ResNet-18 network, a modified version of the `torchvision` model is used: the first convolutional layer is set with a filter of size  $3 \times 3$  and the max-pooling layer that follows has been eliminated to adapt ResNet-18 for CIFAR-10.

CIFAR-10 is augmented with per-channel normalization, random horizontal flipping, and random shifting by up to four pixels in any direction. For the datasets of DomainBed, the images are augmented with per-channel normalization, random horizontal flipping, random cropping, and resizing to 224. The brightness, contrast, saturation, and hue are also randomly affected with a factor fixed to 0.4. Tiny ImageNet is augmented with per-channel normalization and random horizontal flipping. ImageNet is augmented with per-channel normalization, random horizontal flipping, random cropping, and resizing to 224. The sequence length of SST-2, QNLI from Williams et al, and RTE is set to 128.

All weights from ReLU-activated layers are set as prunable for ResNet-18. For Swin-T, BERT, and RoBERTa, all weights from GELU-activated layers are prunable. while for MobileNetv2 all weights from ReLU6-activated layers are considered in the pruning. Neither biases nor batch normalization parameters are pruned.

$\zeta$  is a crucial parameter. As Table 8 shows, in our approach, since we utilize iterative pruning, if the sparse ratio is set too low, more iterations will be required to get removable layers (because we remove fewer parameters at a time). On the other hand, if the sparse ratio is set too high, the model’s performance will be destroyed quickly (because essential parameters are removed). Currently, we follow commonly used sparse ratios from unstructured pruning.

The training hyperparameters used in the Image classification experiments are presented in Table 9, hyper-parameters used in the NLP experiments are presented in Table 10. We have performed our experiments on an NVIDIA A4500 GPU. Our code is attached to this supplementary material and will be publicly available upon acceptance of the article.

Table 8: Iterations (Iter.), Test performance (top-1), and the number of removed layers (Rem.) for MobileNet-V2 trained on CIFAR-10 and pruned by NEPENTHE with different  $\zeta$

| (a) $\zeta = 0.05$ |       |      | (b) $\zeta = 0.1$ |       |      | (c) $\zeta = 0.25$ |       |       |
|--------------------|-------|------|-------------------|-------|------|--------------------|-------|-------|
| Iter.              | top-1 | Rem. | Iter.             | top-1 | Rem. | Iter.              | top-1 | Rem.  |
| 1                  | 93.42 | 1/35 | 1                 | 93.55 | 1/35 | 1                  | 94.12 | 1/35  |
| 3                  | 93.56 | 2/35 | 3                 | 93.14 | 2/35 | 3                  | 10    | 18/35 |
| 7                  | 93.36 | 5/35 | 7                 | 93.26 | 7/35 | 7                  | -     | -     |
| 9                  | 93.54 | 7/35 | 9                 | 92.78 | 9/35 | 9                  | -     | -     |

Table 9: Table of the different employed learning strategies.

| Model            | Dataset       | Epochs | Batch | Opt. | Mom. | LR    | Milestones | Drop Factor | Weight Decay |
|------------------|---------------|--------|-------|------|------|-------|------------|-------------|--------------|
| ResNet-18        | CIFAR-10      | 160    | 128   | SGD  | 0.9  | 0.1   | [80, 120]  | 0.1         | 1e-4         |
| ResNet-50        | CIFAR-10      | 160    | 128   | SGD  | 0.9  | 0.1   | [80, 120]  | 0.1         | 1e-4         |
| ResNet-152       | CIFAR-10      | 160    | 128   | SGD  | 0.9  | 0.1   | [80, 120]  | 0.1         | 1e-4         |
| Swin-T           | CIFAR-10      | 160    | 128   | SGD  | 0.9  | 0.001 | [80, 120]  | 0.1         | 1e-4         |
| MobileNetv2      | CIFAR-10      | 160    | 128   | SGD  | 0.9  | 0.1   | [80, 120]  | 0.1         | 1e-4         |
| MobileNetV2-0.75 | CIFAR-10      | 160    | 128   | SGD  | 0.9  | 0.1   | [80, 120]  | 0.1         | 1e-4         |
| ResNet-18        | PACS          | 30     | 16    | SGD  | 0.9  | 0.001 | [24]       | 0.1         | 5e-4         |
| Swin-T           | PACS          | 30     | 16    | SGD  | 0.9  | 0.001 | [24]       | 0.1         | 5e-4         |
| MobileNetv2      | PACS          | 30     | 16    | SGD  | 0.9  | 0.001 | [24]       | 0.1         | 5e-4         |
| ResNet-18        | VLCS          | 30     | 16    | SGD  | 0.9  | 0.001 | [24]       | 0.1         | 5e-4         |
| Swin-T           | VLCS          | 30     | 16    | SGD  | 0.9  | 0.001 | [24]       | 0.1         | 5e-4         |
| MobileNetv2      | VLCS          | 30     | 16    | SGD  | 0.9  | 0.001 | [24]       | 0.1         | 5e-4         |
| ResNet-18        | SVIRO         | 30     | 16    | SGD  | 0.9  | 0.001 | [24]       | 0.1         | 5e-4         |
| Swin-T           | SVIRO         | 30     | 16    | SGD  | 0.9  | 0.001 | [24]       | 0.1         | 5e-4         |
| MobileNetv2      | SVIRO         | 30     | 16    | SGD  | 0.9  | 0.001 | [24]       | 0.1         | 5e-4         |
| ResNet-18        | Tiny ImageNet | 160    | 128   | SGD  | 0.9  | 0.1   | [80, 120]  | 0.1         | 1e-4         |
| Swin-T           | Tiny ImageNet | 160    | 128   | SGD  | 0.9  | 0.001 | [80, 120]  | 0.1         | 1e-4         |
| MobileNetv2      | Tiny ImageNet | 160    | 128   | SGD  | 0.9  | 0.1   | [80, 120]  | 0.1         | 1e-4         |
| ResNet-18        | ImageNet      | 90     | 128   | SGD  | 0.9  | 0.1   | [30, 90]   | 0.1         | 1e-4         |

Table 10: Table of the different employed learning strategies.

| Model   | Dataset | Epochs | Batch | Opt.  | LR   | $\beta_1$ | $\beta_2$ | $\epsilon$ |
|---------|---------|--------|-------|-------|------|-----------|-----------|------------|
| BERT    | QNLI    | 3      | 32    | AdamW | 2e-5 | 0.9       | 0.999     | 1e-8       |
| RoBERTa | QNLI    | 3      | 32    | AdamW | 2e-5 | 0.9       | 0.999     | 1e-8       |
| BERT    | RTE     | 3      | 32    | AdamW | 2e-5 | 0.9       | 0.999     | 1e-8       |
| RoBERTa | RTE     | 3      | 32    | AdamW | 2e-5 | 0.9       | 0.999     | 1e-8       |
| BERT    | SST-2   | 3      | 32    | AdamW | 2e-5 | 0.9       | 0.999     | 1e-8       |
| RoBERTa | SST-2   | 3      | 32    | AdamW | 2e-5 | 0.9       | 0.999     | 1e-8       |

## D MORE DETAILED RESULTS

### D.1 LAYER STATES FOR MODELS TRAINED ON CIFAR-10

Fig. 14 shows the layers’ states for ResNet-18 trained on CIFAR-10 with different methods.

### D.2 EXPERIMENTS ON MORE ARCHITECTURES

Table 11 presents the results for ResNet-50, ResNet-152, and MobileNetV2-0.75 models trained on Cifar-10 dataset. Table 12 presents the results for ResNet-18 model trained on ImageNet dataset.

Table 11: est performance (top-1) and the number of removed layers (Rem.) for ResNet-50, ResNet-152, and MobileNetV2-0.75 models trained on CIFAR-10.

| Dataset  | Approach | ResNet-50 |       | ResNet-152 |        | MobileNetV2-0.75 |       |
|----------|----------|-----------|-------|------------|--------|------------------|-------|
|          |          | Top-1     | Rem.  | Top-1      | Rem.   | Top-1            | Rem.  |
| CIFAR-10 | Dense    | 87.37     | 0/49  | 85.61      | 0/151  | 85.17            | 0/35  |
|          | NEPENTHE | 89.06     | 16/49 | 89.20      | 82/151 | 87.06            | 12/35 |

### D.3 DETAILED EXPERIMENTAL RESULTS

Tables 13, 14, 15, 16, 17, 18, 19, 20, 21, 22, 23, 24, 25, 26, 27, 29, 29, 30, 31, 32, 33, present the entropy trends in the six layers exhibiting the lowest entropy and the training time, for all the unstructured pruning and NEPENTHE setups. This illustrates that while unstructured pruning inherently reduces the entropy of certain layers, as detailed in Section 4.2, it lacks the capability to entirely eliminate any specific layer. In contrast, our methodology, NEPENTHE, aims to push all the encoded information from layers with low entropy to those with already high entropy. This strategy enables the removal of zero-entropy layers.

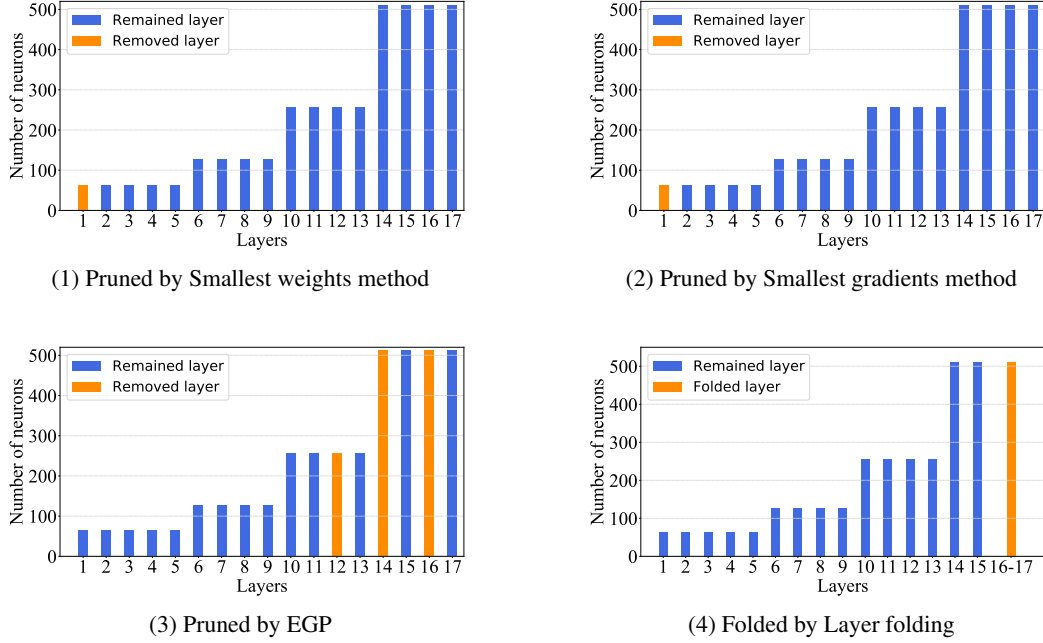

Figure 14: Layer states for ResNet-18 trained on CIFAR-10 with different methods.

Table 12: Test performance (top-1) and the number of removed layers (Rem.) for Resnet-18 trained on Imagenet.

| Dataset  | Approach              | ResNet-18 |      |
|----------|-----------------------|-----------|------|
|          |                       | top-1     | Rem. |
| ImageNet | Dense model           | 68.20     | 0/17 |
|          | IMP (low prune)       | 68.38     | 0/17 |
|          | IMP (mid prune)       | 67.88     | 0/17 |
|          | IMP (high prune)      | 66.63     | 0/17 |
|          | NEPENTHE (low prune)  | 66.17     | 0/17 |
|          | NEPENTHE (mid prune)  | 62.74     | 1/17 |
|          | NEPENTHE (high prune) | 62.15     | 3/17 |

Table 13: Test performance (top-1), bottom six layer’s entropies  $\hat{\mathcal{H}}$  and the number of removed layers (Rem.) for ResNet-18 on CIFAR-10.

| Approach          | $\hat{\mathcal{H}}_1$ | $\hat{\mathcal{H}}_2$ | $\hat{\mathcal{H}}_3$ | $\hat{\mathcal{H}}_4$ | $\hat{\mathcal{H}}_5$ | $\hat{\mathcal{H}}_6$ | top-1 | Rem. | Time |
|-------------------|-----------------------|-----------------------|-----------------------|-----------------------|-----------------------|-----------------------|-------|------|------|
| Dense model       | 0.647                 | 0.680                 | 0.728                 | 0.785                 | 0.791                 | 0.797                 | 91.66 | 0/17 | 0h48 |
| IMP(iter #1)      | 0.585                 | 0.650                 | 0.699                 | 0.725                 | 0.767                 | 0.778                 | 92.29 | 0/17 | 1h36 |
| IMP(iter #2)      | 0.506                 | 0.580                 | 0.647                 | 0.654                 | 0.700                 | 0.722                 | 92.25 | 0/17 | 2h24 |
| IMP(iter #3)      | 0.256                 | 0.623                 | 0.658                 | 0.672                 | 0.682                 | 0.737                 | 92.46 | 0/17 | 3h12 |
| IMP(iter #4)      | 0.192                 | 0.660                 | 0.667                 | 0.676                 | 0.698                 | 0.763                 | 92.27 | 0/17 | 4h00 |
| IMP(iter #5)      | 0.136                 | 0.589                 | 0.648                 | 0.727                 | 0.728                 | 0.791                 | 92.44 | 0/17 | 4h48 |
| IMP(iter #6)      | 0.093                 | 0.447                 | 0.640                 | 0.650                 | 0.764                 | 0.765                 | 91.89 | 0/17 | 5h36 |
| IMP(iter #7)      | 0.055                 | 0.335                 | 0.487                 | 0.592                 | 0.640                 | 0.775                 | 91.66 | 0/17 | 6h24 |
| NEPENTHE(iter #1) | 0                     | 0.168                 | 0.581                 | 0.654                 | 0.681                 | 0.714                 | 92.25 | 1/17 | 1h37 |
| NEPENTHE(iter #2) | 0                     | 0.076                 | 0.615                 | 0.619                 | 0.633                 | 0.644                 | 92.60 | 1/17 | 2h26 |
| NEPENTHE(iter #3) | 0                     | 0                     | 0                     | 0.121                 | 0.139                 | 0.642                 | 92.55 | 3/17 | 3h15 |
| NEPENTHE(iter #4) | 0                     | 0                     | 0                     | 0.003                 | 0.242                 | 0.320                 | 91.93 | 3/17 | 4h04 |
| NEPENTHE(iter #5) | 0                     | 0                     | 0                     | 0                     | 0                     | 0.114                 | 89.30 | 5/17 | 4h53 |
| NEPENTHE(iter #6) | 0                     | 0                     | 0                     | 0                     | 0                     | 0.019                 | 89.43 | 5/17 | 5h42 |
| NEPENTHE(iter #7) | 0                     | 0                     | 0                     | 0                     | 0                     | 0                     | 83.42 | 6/17 | 6h31 |

Table 14: Test performance (top-1), bottom six layer’s entropies  $\hat{\mathcal{H}}$  and the number of removed layers (Rem.) for Swin-T on CIFAR-10.

| Approach          | $\hat{\mathcal{H}}_1$ | $\hat{\mathcal{H}}_2$ | $\hat{\mathcal{H}}_3$ | $\hat{\mathcal{H}}_4$ | $\hat{\mathcal{H}}_5$ | $\hat{\mathcal{H}}_6$ | top-1 | Rem. | Time  |
|-------------------|-----------------------|-----------------------|-----------------------|-----------------------|-----------------------|-----------------------|-------|------|-------|
| Dense model       | 0.03                  | 0.054                 | 0.382                 | 0.394                 | 0.394                 | 0.44                  | 91.54 | 0/12 | 1h53  |
| IMP(iter #1)      | 0.03                  | 0.055                 | 0.383                 | 0.397                 | 0.398                 | 0.444                 | 91.73 | 0/12 | 3h46  |
| IMP(iter #2)      | 0.031                 | 0.057                 | 0.382                 | 0.392                 | 0.399                 | 0.443                 | 91.80 | 0/12 | 5h39  |
| IMP(iter #3)      | 0.034                 | 0.063                 | 0.375                 | 0.383                 | 0.393                 | 0.438                 | 91.43 | 0/12 | 7h32  |
| IMP(iter #4)      | 0.036                 | 0.072                 | 0.365                 | 0.379                 | 0.382                 | 0.426                 | 91.46 | 0/12 | 9h25  |
| IMP(iter #5)      | 0.041                 | 0.080                 | 0.349                 | 0.361                 | 0.369                 | 0.409                 | 91.27 | 0/12 | 11h18 |
| IMP(iter #6)      | 0.048                 | 0.096                 | 0.334                 | 0.343                 | 0.350                 | 0.386                 | 91.05 | 0/12 | 13h11 |
| IMP(iter #7)      | 0.055                 | 0.113                 | 0.31                  | 0.325                 | 0.327                 | 0.355                 | 90.53 | 0/12 | 15h04 |
| NEPENTHE(iter #1) | 0.001                 | 0.215                 | 0.385                 | 0.397                 | 0.407                 | 0.443                 | 91.77 | 0/12 | 3h48  |
| NEPENTHE(iter #2) | 0.001                 | 0.219                 | 0.387                 | 0.399                 | 0.409                 | 0.445                 | 92.06 | 0/12 | 5h45  |
| NEPENTHE(iter #3) | 0.001                 | 0.254                 | 0.380                 | 0.395                 | 0.405                 | 0.440                 | 92.08 | 0/12 | 7h38  |
| NEPENTHE(iter #4) | 0.001                 | 0.001                 | 0.377                 | 0.388                 | 0.404                 | 0.433                 | 92.31 | 0/12 | 9h33  |
| NEPENTHE(iter #5) | 0                     | 0                     | 0.363                 | 0.373                 | 0.406                 | 0.423                 | 92.29 | 2/12 | 11h28 |
| NEPENTHE(iter #6) | 0                     | 0                     | 0.344                 | 0.359                 | 0.407                 | 0.412                 | 92.21 | 2/12 | 13h23 |
| NEPENTHE(iter #7) | 0                     | 0                     | 0.287                 | 0.317                 | 0.405                 | 0.405                 | 92.11 | 2/12 | 15h18 |

Table 15: Test performance (top-1), bottom six layer’s entropies  $\hat{\mathcal{H}}$  and the number of removed layers (Rem.) for MobileNetv2 on CIFAR-10.

| Approach          | $\hat{\mathcal{H}}_1$ | $\hat{\mathcal{H}}_2$ | $\hat{\mathcal{H}}_3$ | $\hat{\mathcal{H}}_4$ | $\hat{\mathcal{H}}_5$ | $\hat{\mathcal{H}}_6$ | top-1 | Rem. | Time |
|-------------------|-----------------------|-----------------------|-----------------------|-----------------------|-----------------------|-----------------------|-------|------|------|
| Dense model       | 0.386                 | 0.474                 | 0.486                 | 0.504                 | 0.528                 | 0.544                 | 93.68 | 0/35 | 0h43 |
| IMP(iter #1)      | 0.186                 | 0.206                 | 0.233                 | 0.241                 | 0.249                 | 0.260                 | 94.07 | 0/35 | 1h26 |
| IMP(iter #2)      | 0.116                 | 0.117                 | 0.153                 | 0.167                 | 0.167                 | 0.168                 | 93.67 | 0/35 | 2h09 |
| IMP(iter #3)      | 0.082                 | 0.084                 | 0.111                 | 0.119                 | 0.119                 | 0.125                 | 93.83 | 0/35 | 2h52 |
| IMP(iter #4)      | 0.063                 | 0.066                 | 0.090                 | 0.094                 | 0.095                 | 0.101                 | 93.32 | 0/35 | 3h35 |
| IMP(iter #5)      | 0.056                 | 0.057                 | 0.074                 | 0.075                 | 0.086                 | 0.088                 | 93.26 | 0/35 | 4h18 |
| IMP(iter #6)      | 0.050                 | 0.050                 | 0.065                 | 0.067                 | 0.071                 | 0.076                 | 93.47 | 0/35 | 5h01 |
| IMP(iter #7)      | 0.046                 | 0.047                 | 0.059                 | 0.060                 | 0.061                 | 0.064                 | 93.50 | 0/35 | 5h44 |
| NEPENTHE(iter #1) | 0                     | 0.198                 | 0.229                 | 0.232                 | 0.244                 | 0.248                 | 93.55 | 1/35 | 1h27 |
| NEPENTHE(iter #2) | 0                     | 0.109                 | 0.127                 | 0.138                 | 0.139                 | 0.149                 | 93.42 | 1/35 | 2h11 |
| NEPENTHE(iter #3) | 0                     | 0.082                 | 0.085                 | 0.103                 | 0.106                 | 0.107                 | 93.14 | 1/35 | 2h55 |
| NEPENTHE(iter #4) | 0                     | 0                     | 0.063                 | 0.065                 | 0.074                 | 0.076                 | 93.25 | 2/35 | 3h39 |
| NEPENTHE(iter #5) | 0                     | 0                     | 0.064                 | 0.067                 | 0.049                 | 0.051                 | 93.37 | 4/35 | 4h23 |
| NEPENTHE(iter #6) | 0                     | 0                     | 0                     | 0                     | 0                     | 0.042                 | 93.15 | 5/35 | 5h07 |
| NEPENTHE(iter #7) | 0                     | 0                     | 0                     | 0                     | 0                     | 0                     | 93.26 | 7/35 | 5h51 |

Table 16: Test performance (top-1), bottom six layer’s entropies  $\hat{\mathcal{H}}$  and the number of removed layers (Rem.) for ResNet-18 on Tiny ImageNet.

| Approach          | $\hat{\mathcal{H}}_1$ | $\hat{\mathcal{H}}_2$ | $\hat{\mathcal{H}}_3$ | $\hat{\mathcal{H}}_4$ | $\hat{\mathcal{H}}_5$ | $\hat{\mathcal{H}}_6$ | top-1 | Rem. | Time  |
|-------------------|-----------------------|-----------------------|-----------------------|-----------------------|-----------------------|-----------------------|-------|------|-------|
| Dense model       | 0.471                 | 0.500                 | 0.592                 | 0.625                 | 0.627                 | 0.783                 | 41.44 | 0/17 | 2h15  |
| IMP(iter #1)      | 0.470                 | 0.540                 | 0.621                 | 0.662                 | 0.666                 | 0.780                 | 42.24 | 0/17 | 4h30  |
| IMP(iter #2)      | 0.461                 | 0.621                 | 0.637                 | 0.697                 | 0.726                 | 0.781                 | 42.12 | 0/17 | 6h45  |
| IMP(iter #3)      | 0.487                 | 0.643                 | 0.735                 | 0.736                 | 0.776                 | 0.779                 | 42.10 | 0/17 | 9h00  |
| IMP(iter #4)      | 0.488                 | 0.643                 | 0.760                 | 0.783                 | 0.831                 | 0.831                 | 41.18 | 0/17 | 11h15 |
| IMP(iter #5)      | 0.482                 | 0.605                 | 0.727                 | 0.839                 | 0.845                 | 0.872                 | 39.92 | 0/17 | 13h30 |
| IMP(iter #6)      | 0.469                 | 0.585                 | 0.690                 | 0.814                 | 0.834                 | 0.834                 | 37.16 | 0/17 | 15h45 |
| IMP(iter #7)      | 0.464                 | 0.544                 | 0.641                 | 0.661                 | 0.725                 | 0.741                 | 39.14 | 0/17 | 18h00 |
| NEPENTHE(iter #1) | 0                     | 0                     | 0.063                 | 0.559                 | 0.633                 | 0.699                 | 41.42 | 2/17 | 4h33  |
| NEPENTHE(iter #2) | 0                     | 0                     | 0                     | 0                     | 0                     | 0.129                 | 39.56 | 5/17 | 6h51  |
| NEPENTHE(iter #3) | 0                     | 0                     | 0                     | 0                     | 0                     | 0.169                 | 40.00 | 5/17 | 9h09  |
| NEPENTHE(iter #4) | 0                     | 0                     | 0                     | 0                     | 0                     | 0.109                 | 39.40 | 5/17 | 11h27 |
| NEPENTHE(iter #5) | 0                     | 0                     | 0                     | 0                     | 0                     | 0.107                 | 38.58 | 5/17 | 13h45 |
| NEPENTHE(iter #6) | 0                     | 0                     | 0                     | 0                     | 0                     | 0.125                 | 37.34 | 5/17 | 16h03 |
| NEPENTHE(iter #7) | 0                     | 0                     | 0                     | 0                     | 0                     | 0.138                 | 35.80 | 5/17 | 18h21 |



Table 17: Test performance (top-1), bottom six layer’s entropies  $\hat{\mathcal{H}}$  and the number of removed layers (Rem.) for Swin-T on Tiny ImageNet.

| Approach          | $\hat{\mathcal{H}}_1$ | $\hat{\mathcal{H}}_2$ | $\hat{\mathcal{H}}_3$ | $\hat{\mathcal{H}}_4$ | $\hat{\mathcal{H}}_5$ | $\hat{\mathcal{H}}_6$ | top-1 | Rem. | Time  |
|-------------------|-----------------------|-----------------------|-----------------------|-----------------------|-----------------------|-----------------------|-------|------|-------|
| Dense model       | 0.067                 | 0.133                 | 0.38                  | 0.388                 | 0.395                 | 0.411                 | 75.60 | 0/12 | 5h41  |
| IMP(iter #1)      | 0.069                 | 0.131                 | 0.370                 | 0.373                 | 0.384                 | 0.399                 | 75.86 | 0/12 | 11h22 |
| IMP(iter #2)      | 0.073                 | 0.133                 | 0.355                 | 0.356                 | 0.367                 | 0.380                 | 75.26 | 0/12 | 17h03 |
| IMP(iter #3)      | 0.080                 | 0.143                 | 0.335                 | 0.336                 | 0.346                 | 0.357                 | 73.60 | 0/12 | 22h44 |
| IMP(iter #4)      | 0.089                 | 0.156                 | 0.313                 | 0.314                 | 0.319                 | 0.330                 | 72.32 | 0/12 | 28h25 |
| IMP(iter #5)      | 0.096                 | 0.169                 | 0.291                 | 0.291                 | 0.295                 | 0.309                 | 70.90 | 0/12 | 34h06 |
| IMP(iter #6)      | 0.102                 | 0.184                 | 0.268                 | 0.269                 | 0.275                 | 0.294                 | 69.80 | 0/12 | 39h47 |
| IMP(iter #7)      | 0.104                 | 0.193                 | 0.249                 | 0.255                 | 0.266                 | 0.289                 | 67.56 | 0/12 | 45h28 |
| NEPENTHE(iter #1) | 0                     | 0.139                 | 0.370                 | 0.377                 | 0.392                 | 0.394                 | 72.58 | 1/12 | 11h27 |
| NEPENTHE(iter #2) | 0                     | 0.143                 | 0.150                 | 0.183                 | 0.195                 | 0.381                 | 71.02 | 1/12 | 17h13 |
| NEPENTHE(iter #3) | 0                     | 0.143                 | 0.158                 | 0.183                 | 0.192                 | 0.269                 | 70.76 | 1/12 | 22h59 |
| NEPENTHE(iter #4) | 0                     | 0.133                 | 0.137                 | 0.165                 | 0.178                 | 0.187                 | 70.12 | 1/12 | 28h45 |
| NEPENTHE(iter #5) | 0                     | 0.128                 | 0.132                 | 0.172                 | 0.173                 | 0.180                 | 69.68 | 1/12 | 34h36 |
| NEPENTHE(iter #6) | 0                     | 0.124                 | 0.129                 | 0.164                 | 0.174                 | 0.176                 | 70.06 | 1/12 | 39h17 |
| NEPENTHE(iter #7) | 0                     | 0.123                 | 0.128                 | 0.160                 | 0.170                 | 0.180                 | 69.42 | 1/12 | 46h03 |

Table 18: Test performance (top-1), bottom six layer’s entropies  $\hat{\mathcal{H}}$  and the number of removed layers (Rem.) for MobileNetv2 on Tiny ImageNet.

| Approach          | $\hat{\mathcal{H}}_1$ | $\hat{\mathcal{H}}_2$ | $\hat{\mathcal{H}}_3$ | $\hat{\mathcal{H}}_4$ | $\hat{\mathcal{H}}_5$ | $\hat{\mathcal{H}}_6$ | top-1  | Rem.  | Time  |
|-------------------|-----------------------|-----------------------|-----------------------|-----------------------|-----------------------|-----------------------|--------|-------|-------|
| Dense model       | 0.076                 | 0.112                 | 0.131                 | 0.133                 | 0.153                 | 0.154                 | 45.860 | 0/35  | 1h47  |
| IMP(iter #1)      | 0.036                 | 0.039                 | 0.039                 | 0.045                 | 0.048                 | 0.054                 | 45.84  | 0/35  | 3h34  |
| IMP(iter #2)      | 0.025                 | 0.026                 | 0.031                 | 0.035                 | 0.037                 | 0.037                 | 47.10  | 0/35  | 5h21  |
| IMP(iter #3)      | 0.018                 | 0.021                 | 0.030                 | 0.030                 | 0.031                 | 0.031                 | 47.740 | 0/35  | 7h08  |
| IMP(iter #4)      | 0.016                 | 0.017                 | 0.028                 | 0.028                 | 0.030                 | 0.030                 | 46.800 | 0/35  | 8h55  |
| IMP(iter #5)      | 0.013                 | 0.016                 | 0.025                 | 0.025                 | 0.028                 | 0.029                 | 47.560 | 0/35  | 10h42 |
| IMP(iter #6)      | 0.008                 | 0.011                 | 0.022                 | 0.023                 | 0.028                 | 0.028                 | 47.580 | 0/35  | 12h29 |
| IMP(iter #7)      | 0.007                 | 0.01                  | 0.022                 | 0.023                 | 0.028                 | 0.029                 | 47.440 | 0/35  | 14h16 |
| NEPENTHE(iter #1) | 0.001                 | 0.004                 | 0.095                 | 0.096                 | 0.098                 | 0.110                 | 46.70  | 0/35  | 3h37  |
| NEPENTHE(iter #2) | 0                     | 0.003                 | 0.058                 | 0.064                 | 0.071                 | 0.073                 | 47.22  | 1/35  | 5h27  |
| NEPENTHE(iter #3) | 0                     | 0                     | 0                     | 0                     | 0                     | 0                     | 47.26  | 6/35  | 7h17  |
| NEPENTHE(iter #4) | 0                     | 0                     | 0                     | 0                     | 0                     | 0                     | 47.82  | 9/35  | 9h07  |
| NEPENTHE(iter #5) | 0                     | 0                     | 0                     | 0                     | 0                     | 0                     | 47.92  | 12/35 | 10h57 |
| NEPENTHE(iter #6) | 0                     | 0                     | 0                     | 0                     | 0                     | 0                     | 0.50   | 34/35 | 12h37 |

Table 19: Test performance (top-1), bottom six layer’s entropies  $\hat{\mathcal{H}}$  and the number of removed layers (Rem.) for ResNet-18 on PACS.

| Approach          | $\hat{\mathcal{H}}_1$ | $\hat{\mathcal{H}}_2$ | $\hat{\mathcal{H}}_3$ | $\hat{\mathcal{H}}_4$ | $\hat{\mathcal{H}}_5$ | $\hat{\mathcal{H}}_6$ | top-1 | Rem. | Time |
|-------------------|-----------------------|-----------------------|-----------------------|-----------------------|-----------------------|-----------------------|-------|------|------|
| Dense model       | 0.332                 | 0.439                 | 0.602                 | 0.667                 | 0.686                 | 0.687                 | 94.70 | 0/17 | 0h46 |
| IMP(iter #1)      | 0.331                 | 0.423                 | 0.608                 | 0.669                 | 0.688                 | 0.688                 | 95.40 | 0/17 | 1h31 |
| IMP(iter #2)      | 0.319                 | 0.429                 | 0.602                 | 0.668                 | 0.670                 | 0.683                 | 95.30 | 0/17 | 2h17 |
| IMP(iter #3)      | 0.324                 | 0.419                 | 0.607                 | 0.631                 | 0.682                 | 0.682                 | 94.60 | 0/17 | 3h03 |
| IMP(iter #4)      | 0.318                 | 0.441                 | 0.613                 | 0.613                 | 0.661                 | 0.688                 | 95.10 | 0/17 | 3h49 |
| IMP(iter #5)      | 0.300                 | 0.452                 | 0.587                 | 0.621                 | 0.636                 | 0.694                 | 94.00 | 0/17 | 4h35 |
| IMP(iter #6)      | 0.285                 | 0.458                 | 0.533                 | 0.643                 | 0.647                 | 0.694                 | 92.30 | 0/17 | 5h21 |
| IMP(iter #7)      | 0.280                 | 0.418                 | 0.479                 | 0.584                 | 0.646                 | 0.657                 | 90.80 | 0/17 | 6h07 |
| NEPENTHE(iter #1) | 0.129                 | 0.430                 | 0.482                 | 0.634                 | 0.668                 | 0.669                 | 94.20 | 0/17 | 1h32 |
| NEPENTHE(iter #2) | 0                     | 0.041                 | 0.091                 | 0.482                 | 0.596                 | 0.596                 | 92.40 | 1/17 | 2h19 |
| NEPENTHE(iter #3) | 0                     | 0.030                 | 0.066                 | 0.527                 | 0.559                 | 0.599                 | 93.00 | 1/17 | 3h06 |
| NEPENTHE(iter #4) | 0                     | 0                     | 0.033                 | 0.067                 | 0.422                 | 0.565                 | 90.40 | 2/17 | 3h53 |
| NEPENTHE(iter #5) | 0                     | 0                     | 0.032                 | 0.061                 | 0.084                 | 0.217                 | 89.50 | 2/17 | 4h40 |
| NEPENTHE(iter #6) | 0                     | 0                     | 0                     | 0.001                 | 0.002                 | 0.028                 | 90.10 | 3/17 | 5h27 |
| NEPENTHE(iter #7) | 0                     | 0                     | 0                     | 0.002                 | 0.002                 | 0.040                 | 86.30 | 3/17 | 6h14 |

Table 20: Test performance (top-1), bottom six layer’s entropies  $\hat{\mathcal{H}}$  and the number of removed layers (Rem.) for Swin-T on PACS.

| Approach          | $\hat{\mathcal{H}}_1$ | $\hat{\mathcal{H}}_2$ | $\hat{\mathcal{H}}_3$ | $\hat{\mathcal{H}}_4$ | $\hat{\mathcal{H}}_5$ | $\hat{\mathcal{H}}_6$ | top-1 | Rem. | Time |
|-------------------|-----------------------|-----------------------|-----------------------|-----------------------|-----------------------|-----------------------|-------|------|------|
| Dense model       | 0.057                 | 0.184                 | 0.344                 | 0.362                 | 0.380                 | 0.381                 | 97.10 | 0/12 | 0h57 |
| IMP(iter #1)      | 0.060                 | 0.204                 | 0.349                 | 0.362                 | 0.382                 | 0.389                 | 96.60 | 0/12 | 1h54 |
| IMP(iter #2)      | 0.067                 | 0.214                 | 0.357                 | 0.370                 | 0.383                 | 0.388                 | 96.20 | 0/12 | 2h51 |
| IMP(iter #3)      | 0.081                 | 0.245                 | 0.362                 | 0.366                 | 0.375                 | 0.378                 | 96.00 | 0/12 | 3h48 |
| IMP(iter #4)      | 0.095                 | 0.269                 | 0.352                 | 0.353                 | 0.355                 | 0.372                 | 96.60 | 0/12 | 4h45 |
| IMP(iter #5)      | 0.110                 | 0.303                 | 0.314                 | 0.335                 | 0.339                 | 0.341                 | 95.00 | 0/12 | 5h42 |
| IMP(iter #6)      | 0.113                 | 0.278                 | 0.306                 | 0.318                 | 0.321                 | 0.329                 | 94.60 | 0/12 | 6h39 |
| IMP(iter #7)      | 0.101                 | 0.232                 | 0.269                 | 0.284                 | 0.293                 | 0.298                 | 93.90 | 0/12 | 7h36 |
| NEPENTHE(iter #1) | 0.086                 | 0.240                 | 0.344                 | 0.376                 | 0.376                 | 0.403                 | 96.90 | 0/12 | 1h55 |
| NEPENTHE(iter #2) | 0.001                 | 0.369                 | 0.372                 | 0.383                 | 0.398                 | 0.416                 | 96.50 | 0/12 | 2h53 |
| NEPENTHE(iter #3) | 0.001                 | 0.368                 | 0.383                 | 0.385                 | 0.390                 | 0.406                 | 95.90 | 0/12 | 3h51 |
| NEPENTHE(iter #4) | 0.001                 | 0.360                 | 0.369                 | 0.369                 | 0.392                 | 0.394                 | 96.30 | 0/12 | 4h49 |
| NEPENTHE(iter #5) | 0                     | 0                     | 0.001                 | 0.335                 | 0.359                 | 0.366                 | 95.10 | 2/12 | 5h47 |
| NEPENTHE(iter #6) | 0                     | 0                     | 0.107                 | 0.298                 | 0.348                 | 0.349                 | 94.60 | 2/12 | 6h45 |
| NEPENTHE(iter #7) | 0                     | 0                     | 0.001                 | 0.001                 | 0.161                 | 0.232                 | 93.30 | 2/12 | 7h43 |

Table 21: Test performance (top-1), bottom six layer’s entropies  $\hat{\mathcal{H}}$  and the number of removed layers (Rem.) for MobileNetv2 on PACS.

| Approach          | $\hat{\mathcal{H}}_1$ | $\hat{\mathcal{H}}_2$ | $\hat{\mathcal{H}}_3$ | $\hat{\mathcal{H}}_4$ | $\hat{\mathcal{H}}_5$ | $\hat{\mathcal{H}}_6$ | top-1 | Rem. | Time |
|-------------------|-----------------------|-----------------------|-----------------------|-----------------------|-----------------------|-----------------------|-------|------|------|
| Dense model       | 0.207                 | 0.291                 | 0.324                 | 0.372                 | 0.463                 | 0.471                 | 93.20 | 0/35 | 0h34 |
| IMP(iter #1)      | 0.218                 | 0.263                 | 0.284                 | 0.390                 | 0.457                 | 0.467                 | 95.70 | 0/35 | 1h09 |
| IMP(iter #2)      | 0.216                 | 0.235                 | 0.257                 | 0.373                 | 0.453                 | 0.462                 | 95.50 | 0/35 | 1h44 |
| IMP(iter #3)      | 0.224                 | 0.244                 | 0.252                 | 0.403                 | 0.464                 | 0.478                 | 95.40 | 0/35 | 2h19 |
| IMP(iter #4)      | 0.222                 | 0.229                 | 0.241                 | 0.386                 | 0.459                 | 0.476                 | 95.70 | 0/35 | 2h54 |
| IMP(iter #5)      | 0.212                 | 0.223                 | 0.233                 | 0.397                 | 0.464                 | 0.47                  | 95.60 | 0/35 | 3h29 |
| IMP(iter #6)      | 0.196                 | 0.212                 | 0.237                 | 0.405                 | 0.470                 | 0.485                 | 96.20 | 0/35 | 4h04 |
| IMP(iter #7)      | 0.170                 | 0.207                 | 0.234                 | 0.412                 | 0.468                 | 0.472                 | 95.40 | 0/35 | 4h39 |
| NEPENTHE(iter #1) | 0.119                 | 0.139                 | 0.151                 | 0.192                 | 0.200                 | 0.225                 | 93.30 | 0/35 | 1h10 |
| NEPENTHE(iter #2) | 0.093                 | 0.128                 | 0.129                 | 0.130                 | 0.135                 | 0.165                 | 93.20 | 0/35 | 1h46 |
| NEPENTHE(iter #3) | 0.077                 | 0.093                 | 0.112                 | 0.125                 | 0.140                 | 0.141                 | 92.50 | 0/35 | 2h22 |
| NEPENTHE(iter #4) | 0                     | 0.076                 | 0.083                 | 0.105                 | 0.106                 | 0.116                 | 92.20 | 1/35 | 2h58 |
| NEPENTHE(iter #5) | 0                     | 0.054                 | 0.068                 | 0.096                 | 0.097                 | 0.115                 | 89.70 | 1/35 | 3h34 |
| NEPENTHE(iter #6) | 0                     | 0.014                 | 0.016                 | 0.036                 | 0.050                 | 0.051                 | 89.00 | 1/35 | 4h10 |
| NEPENTHE(iter #7) | 0                     | 0.004                 | 0.008                 | 0.023                 | 0.027                 | 0.034                 | 88.70 | 1/35 | 4h46 |

Table 22: Test performance (top-1), bottom six layer’s entropies  $\hat{\mathcal{H}}$  and the number of removed layers (Rem.) for ResNet-18 on VLCS.

| Approach          | $\hat{\mathcal{H}}_1$ | $\hat{\mathcal{H}}_2$ | $\hat{\mathcal{H}}_3$ | $\hat{\mathcal{H}}_4$ | $\hat{\mathcal{H}}_5$ | $\hat{\mathcal{H}}_6$ | top-1 | Rem. | Time  |
|-------------------|-----------------------|-----------------------|-----------------------|-----------------------|-----------------------|-----------------------|-------|------|-------|
| Dense model       | 0.382                 | 0.457                 | 0.647                 | 0.676                 | 0.681                 | 0.698                 | 80.89 | 0/17 | 3h49  |
| IMP(iter #1)      | 0.387                 | 0.471                 | 0.647                 | 0.679                 | 0.681                 | 0.703                 | 82.76 | 0/17 | 8h37  |
| IMP(iter #2)      | 0.392                 | 0.476                 | 0.644                 | 0.654                 | 0.69                  | 0.703                 | 82.01 | 0/17 | 13h06 |
| IMP(iter #3)      | 0.378                 | 0.474                 | 0.620                 | 0.658                 | 0.707                 | 0.707                 | 82.01 | 0/17 | 17h15 |
| IMP(iter #4)      | 0.391                 | 0.491                 | 0.595                 | 0.672                 | 0.711                 | 0.726                 | 80.15 | 0/17 | 22h24 |
| IMP(iter #5)      | 0.372                 | 0.479                 | 0.571                 | 0.665                 | 0.716                 | 0.739                 | 79.31 | 0/17 | 27h13 |
| IMP(iter #6)      | 0.383                 | 0.519                 | 0.531                 | 0.699                 | 0.721                 | 0.750                 | 78.84 | 0/17 | 31h22 |
| IMP(iter #7)      | 0.357                 | 0.409                 | 0.502                 | 0.64                  | 0.707                 | 0.712                 | 74.09 | 0/17 | 35h11 |
| NEPENTHE(iter #1) | 0.001                 | 0.453                 | 0.497                 | 0.651                 | 0.676                 | 0.680                 | 78.99 | 0/17 | 8h44  |
| NEPENTHE(iter #2) | 0                     | 0                     | 0.001                 | 0.508                 | 0.516                 | 0.619                 | 78.38 | 2/17 | 13h20 |
| NEPENTHE(iter #3) | 0                     | 0                     | 0                     | 0                     | 0.518                 | 0.553                 | 76.98 | 4/17 | 17h36 |
| NEPENTHE(iter #4) | 0                     | 0                     | 0                     | 0                     | 0.516                 | 0.574                 | 78.66 | 4/17 | 22h52 |
| NEPENTHE(iter #5) | 0                     | 0                     | 0                     | 0                     | 0                     | 0                     | 76.05 | 6/17 | 27h48 |
| NEPENTHE(iter #6) | 0                     | 0                     | 0                     | 0                     | 0                     | 0                     | 74.28 | 6/17 | 32h04 |
| NEPENTHE(iter #7) | 0                     | 0                     | 0                     | 0                     | 0                     | 0                     | 74.37 | 6/17 | 36h01 |

Table 23: Test performance (top-1), bottom six layer’s entropies  $\hat{\mathcal{H}}$  and the number of removed layers (Rem.) for Swin-T on VLCS.

| Approach          | $\hat{\mathcal{H}}_1$ | $\hat{\mathcal{H}}_2$ | $\hat{\mathcal{H}}_3$ | $\hat{\mathcal{H}}_4$ | $\hat{\mathcal{H}}_5$ | $\hat{\mathcal{H}}_6$ | top-1 | Rem. | Time  |
|-------------------|-----------------------|-----------------------|-----------------------|-----------------------|-----------------------|-----------------------|-------|------|-------|
| Dense model       | 0.070                 | 0.175                 | 0.373                 | 0.385                 | 0.414                 | 0.427                 | 86.58 | 0/12 | 2h22  |
| IMP(iter #1)      | 0.078                 | 0.179                 | 0.391                 | 0.402                 | 0.421                 | 0.433                 | 84.72 | 0/12 | 4h45  |
| IMP(iter #2)      | 0.093                 | 0.195                 | 0.387                 | 0.403                 | 0.416                 | 0.419                 | 85.65 | 0/12 | 8h08  |
| IMP(iter #3)      | 0.102                 | 0.224                 | 0.388                 | 0.411                 | 0.424                 | 0.424                 | 84.34 | 0/12 | 11h31 |
| IMP(iter #4)      | 0.122                 | 0.236                 | 0.395                 | 0.402                 | 0.415                 | 0.418                 | 84.06 | 0/12 | 14h54 |
| IMP(iter #5)      | 0.140                 | 0.261                 | 0.369                 | 0.394                 | 0.404                 | 0.412                 | 82.01 | 0/12 | 18h56 |
| IMP(iter #6)      | 0.141                 | 0.292                 | 0.331                 | 0.387                 | 0.390                 | 0.393                 | 81.36 | 0/12 | 22h38 |
| IMP(iter #7)      | 0.139                 | 0.277                 | 0.304                 | 0.370                 | 0.373                 | 0.374                 | 80.06 | 0/12 | 26h20 |
| NEPENTHE(iter #1) | 0.121                 | 0.187                 | 0.400                 | 0.402                 | 0.430                 | 0.437                 | 85.46 | 0/12 | 4h57  |
| NEPENTHE(iter #2) | 0.132                 | 0.225                 | 0.403                 | 0.406                 | 0.428                 | 0.438                 | 85.09 | 0/12 | 8h26  |
| NEPENTHE(iter #3) | 0                     | 0.411                 | 0.413                 | 0.432                 | 0.437                 | 0.457                 | 85.27 | 1/12 | 11h55 |
| NEPENTHE(iter #4) | 0                     | 0.409                 | 0.420                 | 0.441                 | 0.446                 | 0.463                 | 83.88 | 1/12 | 15h18 |
| NEPENTHE(iter #5) | 0                     | 0.406                 | 0.409                 | 0.428                 | 0.434                 | 0.469                 | 81.73 | 1/12 | 19h28 |
| NEPENTHE(iter #6) | 0                     | 0.318                 | 0.383                 | 0.398                 | 0.413                 | 0.469                 | 81.55 | 1/12 | 23h20 |
| NEPENTHE(iter #7) | 0                     | 0.001                 | 0.304                 | 0.369                 | 0.374                 | 0.475                 | 79.22 | 1/12 | 27h08 |

Table 24: Test performance (top-1), bottom six layer’s entropies  $\hat{\mathcal{H}}$  and the number of removed layers (Rem.) for MobileNetv2 on VLCS.

| Approach          | $\hat{\mathcal{H}}_1$ | $\hat{\mathcal{H}}_2$ | $\hat{\mathcal{H}}_3$ | $\hat{\mathcal{H}}_4$ | $\hat{\mathcal{H}}_5$ | $\hat{\mathcal{H}}_6$ | top-1 | Rem. | Time  |
|-------------------|-----------------------|-----------------------|-----------------------|-----------------------|-----------------------|-----------------------|-------|------|-------|
| Dense model       | 0.257                 | 0.353                 | 0.46                  | 0.513                 | 0.514                 | 0.572                 | 81.83 | 0/35 | 3h00  |
| IMP(iter #1)      | 0.270                 | 0.292                 | 0.490                 | 0.503                 | 0.533                 | 0.573                 | 80.80 | 0/35 | 6h01  |
| IMP(iter #2)      | 0.261                 | 0.263                 | 0.507                 | 0.524                 | 0.528                 | 0.562                 | 81.64 | 0/35 | 9h01  |
| IMP(iter #3)      | 0.269                 | 0.271                 | 0.496                 | 0.501                 | 0.536                 | 0.573                 | 80.43 | 0/35 | 12h02 |
| IMP(iter #4)      | 0.258                 | 0.258                 | 0.491                 | 0.521                 | 0.550                 | 0.579                 | 79.59 | 0/35 | 15h03 |
| IMP(iter #5)      | 0.264                 | 0.271                 | 0.474                 | 0.540                 | 0.545                 | 0.589                 | 79.96 | 0/35 | 18h03 |
| IMP(iter #6)      | 0.268                 | 0.277                 | 0.468                 | 0.547                 | 0.549                 | 0.585                 | 80.80 | 0/35 | 21h04 |
| IMP(iter #7)      | 0.273                 | 0.279                 | 0.470                 | 0.524                 | 0.554                 | 0.592                 | 80.43 | 0/35 | 24h05 |
| NEPENTHE(iter #1) | 0.184                 | 0.249                 | 0.342                 | 0.505                 | 0.534                 | 0.581                 | 81.08 | 0/35 | 6h04  |
| NEPENTHE(iter #2) | 0.001                 | 0.077                 | 0.251                 | 0.345                 | 0.417                 | 0.500                 | 80.52 | 0/35 | 9h07  |
| NEPENTHE(iter #3) | 0                     | 0.002                 | 0.005                 | 0.260                 | 0.354                 | 0.488                 | 78.84 | 1/35 | 12h11 |
| NEPENTHE(iter #4) | 0                     | 0.001                 | 0.040                 | 0.261                 | 0.363                 | 0.527                 | 77.91 | 1/35 | 15h15 |
| NEPENTHE(iter #5) | 0                     | 0                     | 0.001                 | 0.274                 | 0.366                 | 0.523                 | 80.06 | 2/35 | 18h18 |
| NEPENTHE(iter #6) | 0                     | 0                     | 0.001                 | 0.26                  | 0.351                 | 0.485                 | 79.31 | 2/35 | 21h22 |

Table 25: Test performance (top-1), bottom six layer’s entropies  $\hat{\mathcal{H}}$  and the number of removed layers (Rem.) for ResNet-18 on SVIRO.

| Approach          | $\hat{\mathcal{H}}_1$ | $\hat{\mathcal{H}}_2$ | $\hat{\mathcal{H}}_3$ | $\hat{\mathcal{H}}_4$ | $\hat{\mathcal{H}}_5$ | $\hat{\mathcal{H}}_6$ | top-1 | Rem. | Time  |
|-------------------|-----------------------|-----------------------|-----------------------|-----------------------|-----------------------|-----------------------|-------|------|-------|
| Dense model       | 0.009                 | 0.446                 | 0.631                 | 0.685                 | 0.693                 | 0.707                 | 99.93 | 0/17 | 7h03  |
| IMP(iter #1)      | 0.009                 | 0.456                 | 0.629                 | 0.679                 | 0.684                 | 0.705                 | 99.98 | 0/17 | 14h06 |
| IMP(iter #2)      | 0.008                 | 0.446                 | 0.624                 | 0.646                 | 0.68                  | 0.700                 | 99.98 | 0/17 | 21h09 |
| IMP(iter #3)      | 0.009                 | 0.454                 | 0.638                 | 0.655                 | 0.676                 | 0.689                 | 100   | 0/17 | 28h12 |
| IMP(iter #4)      | 0.007                 | 0.478                 | 0.641                 | 0.658                 | 0.677                 | 0.687                 | 99.95 | 0/17 | 35h15 |
| IMP(iter #5)      | 0.010                 | 0.507                 | 0.658                 | 0.659                 | 0.698                 | 0.702                 | 99.96 | 0/17 | 42h18 |
| IMP(iter #6)      | 0.006                 | 0.530                 | 0.577                 | 0.676                 | 0.688                 | 0.691                 | 100   | 0/17 | 49h21 |
| IMP(iter #7)      | 0.003                 | 0.488                 | 0.495                 | 0.518                 | 0.629                 | 0.657                 | 99.95 | 0/17 | 56h26 |
| NEPENTHE(iter #1) | 0.001                 | 0.512                 | 0.551                 | 0.649                 | 0.686                 | 0.702                 | 99.98 | 0/17 | 14h19 |
| NEPENTHE(iter #2) | 0                     | 0                     | 0.001                 | 0.031                 | 0.453                 | 0.460                 | 99.93 | 2/17 | 21h35 |
| NEPENTHE(iter #3) | 0                     | 0                     | 0.012                 | 0.397                 | 0.440                 | 0.598                 | 99.91 | 2/17 | 28h51 |
| NEPENTHE(iter #4) | 0                     | 0                     | 0                     | 0.006                 | 0.013                 | 0.371                 | 99.86 | 3/17 | 36h07 |
| NEPENTHE(iter #5) | 0                     | 0                     | 0                     | 0.001                 | 0.005                 | 0.054                 | 99.84 | 3/17 | 43h23 |
| NEPENTHE(iter #6) | 0                     | 0                     | 0                     | 0                     | 0                     | 0                     | 99.61 | 8/17 | 50h44 |
| NEPENTHE(iter #7) | 0                     | 0                     | 0                     | 0                     | 0                     | 0                     | 98.75 | 8/17 | 57h57 |

Table 26: Test performance (top-1), bottom six layer’s entropies  $\hat{\mathcal{H}}$  and the number of removed layers (Rem.) for Swin-T on SVIRO.

| Approach          | $\hat{\mathcal{H}}_1$ | $\hat{\mathcal{H}}_2$ | $\hat{\mathcal{H}}_3$ | $\hat{\mathcal{H}}_4$ | $\hat{\mathcal{H}}_5$ | $\hat{\mathcal{H}}_6$ | top-1 | Rem. | Time  |
|-------------------|-----------------------|-----------------------|-----------------------|-----------------------|-----------------------|-----------------------|-------|------|-------|
| Dense model       | 0.061                 | 0.205                 | 0.280                 | 0.290                 | 0.321                 | 0.325                 | 99.95 | 0/12 | 5h38  |
| IMP(iter #1)      | 0.046                 | 0.232                 | 0.284                 | 0.285                 | 0.291                 | 0.303                 | 99.84 | 0/12 | 12h17 |
| IMP(iter #2)      | 0.026                 | 0.125                 | 0.273                 | 0.280                 | 0.283                 | 0.289                 | 99.77 | 0/12 | 18h56 |
| IMP(iter #3)      | 0.022                 | 0.062                 | 0.216                 | 0.233                 | 0.238                 | 0.275                 | 99.84 | 0/12 | 25h55 |
| IMP(iter #4)      | 0.027                 | 0.071                 | 0.163                 | 0.183                 | 0.187                 | 0.187                 | 99.68 | 0/12 | 32h14 |
| IMP(iter #5)      | 0.034                 | 0.095                 | 0.101                 | 0.115                 | 0.143                 | 0.149                 | 99.68 | 0/12 | 39h33 |
| IMP(iter #6)      | 0.036                 | 0.047                 | 0.090                 | 0.125                 | 0.127                 | 0.129                 | 99.79 | 0/12 | 46h12 |
| IMP(iter #7)      | 0.026                 | 0.041                 | 0.074                 | 0.124                 | 0.127                 | 0.137                 | 99.75 | 0/12 | 52h01 |
| NEPENTHE(iter #1) | 0.001                 | 0.269                 | 0.321                 | 0.326                 | 0.343                 | 0.348                 | 99.93 | 0/12 | 12h28 |
| NEPENTHE(iter #2) | 0                     | 0.338                 | 0.347                 | 0.357                 | 0.362                 | 0.367                 | 99.82 | 1/12 | 19h18 |
| NEPENTHE(iter #3) | 0                     | 0.156                 | 0.282                 | 0.309                 | 0.376                 | 0.381                 | 99.79 | 1/12 | 26h28 |
| NEPENTHE(iter #4) | 0                     | 0.001                 | 0.092                 | 0.235                 | 0.267                 | 0.356                 | 99.68 | 1/12 | 32h58 |
| NEPENTHE(iter #5) | 0                     | 0                     | 0.001                 | 0.001                 | 0.001                 | 0.339                 | 99.77 | 2/12 | 40h28 |
| NEPENTHE(iter #6) | 0                     | 0                     | 0                     | 0                     | 0                     | 0.162                 | 99.75 | 5/12 | 47h18 |
| NEPENTHE(iter #7) | 0                     | 0                     | 0                     | 0                     | 0                     | 0.001                 | 99.70 | 5/12 | 53h18 |

Table 27: Test performance (top-1), bottom six layer’s entropies  $\hat{\mathcal{H}}$  and the number of removed layers (Rem.) for MobileNetv2 on SVIRO.

| Approach          | $\hat{\mathcal{H}}_1$ | $\hat{\mathcal{H}}_2$ | $\hat{\mathcal{H}}_3$ | $\hat{\mathcal{H}}_4$ | $\hat{\mathcal{H}}_5$ | $\hat{\mathcal{H}}_6$ | top-1 | Rem. | Time  |
|-------------------|-----------------------|-----------------------|-----------------------|-----------------------|-----------------------|-----------------------|-------|------|-------|
| Dense model       | 0.187                 | 0.241                 | 0.337                 | 0.341                 | 0.484                 | 0.508                 | 99.98 | 0/35 | 5h35  |
| IMP(iter #1)      | 0.165                 | 0.218                 | 0.248                 | 0.366                 | 0.478                 | 0.515                 | 99.98 | 0/35 | 12h11 |
| IMP(iter #2)      | 0.152                 | 0.191                 | 0.232                 | 0.402                 | 0.471                 | 0.560                 | 100   | 0/35 | 18h47 |
| IMP(iter #3)      | 0.161                 | 0.180                 | 0.290                 | 0.411                 | 0.483                 | 0.521                 | 99.98 | 0/35 | 24h23 |
| IMP(iter #4)      | 0.169                 | 0.215                 | 0.296                 | 0.419                 | 0.430                 | 0.483                 | 99.96 | 0/35 | 30h19 |
| IMP(iter #5)      | 0.162                 | 0.173                 | 0.306                 | 0.372                 | 0.417                 | 0.435                 | 99.93 | 0/35 | 36h35 |
| IMP(iter #6)      | 0.155                 | 0.196                 | 0.333                 | 0.337                 | 0.362                 | 0.417                 | 99.93 | 0/35 | 42h31 |
| IMP(iter #7)      | 0.146                 | 0.185                 | 0.291                 | 0.317                 | 0.322                 | 0.381                 | 99.95 | 0/35 | 48h47 |
| NEPENTHE(iter #1) | 0.001                 | 0.168                 | 0.220                 | 0.385                 | 0.459                 | 0.508                 | 100   | 0/35 | 12h22 |
| NEPENTHE(iter #2) | 0.001                 | 0.001                 | 0.163                 | 0.196                 | 0.321                 | 0.367                 | 99.98 | 0/35 | 19h09 |
| NEPENTHE(iter #3) | 0                     | 0                     | 0.002                 | 0.059                 | 0.218                 | 0.375                 | 99.98 | 2/35 | 24h56 |
| NEPENTHE(iter #4) | 0                     | 0                     | 0.004                 | 0.020                 | 0.268                 | 0.392                 | 99.95 | 2/35 | 30h54 |
| NEPENTHE(iter #5) | 0                     | 0                     | 0.001                 | 0.045                 | 0.262                 | 0.388                 | 99.97 | 2/35 | 37h19 |
| NEPENTHE(iter #6) | 0                     | 0                     | 0                     | 0                     | 0.020                 | 0.147                 | 35.55 | 4/35 | 49h53 |

Table 28: Test performance (top-1), bottom six layer’s entropies  $\hat{\mathcal{H}}$  and the number of removed layers (Rem.) for BERT on QNLI.

| Approach          | $\hat{\mathcal{H}}_1$ | $\hat{\mathcal{H}}_2$ | $\hat{\mathcal{H}}_3$ | $\hat{\mathcal{H}}_4$ | $\hat{\mathcal{H}}_5$ | $\hat{\mathcal{H}}_6$ | top-1 | Rem. | Time |
|-------------------|-----------------------|-----------------------|-----------------------|-----------------------|-----------------------|-----------------------|-------|------|------|
| Dense model       | 0.173                 | 0.191                 | 0.212                 | 0.219                 | 0.223                 | 0.227                 | 90.48 | 0/12 | 0h34 |
| IMP(iter #1)      | 0.179                 | 0.198                 | 0.224                 | 0.229                 | 0.238                 | 0.248                 | 89.60 | 0/12 | 1h11 |
| IMP(iter #2)      | 0.202                 | 0.209                 | 0.213                 | 0.220                 | 0.224                 | 0.258                 | 89.91 | 0/12 | 1h47 |
| IMP(iter #3)      | 0.215                 | 0.217                 | 0.234                 | 0.243                 | 0.250                 | 0.269                 | 89.80 | 0/12 | 2h23 |
| IMP(iter #4)      | 0.231                 | 0.235                 | 0.251                 | 0.252                 | 0.269                 | 0.300                 | 89.75 | 0/12 | 2h59 |
| IMP(iter #5)      | 0.238                 | 0.241                 | 0.248                 | 0.256                 | 0.284                 | 0.306                 | 89.38 | 0/12 | 3h35 |
| IMP(iter #6)      | 0.265                 | 0.268                 | 0.269                 | 0.280                 | 0.294                 | 0.335                 | 89.15 | 0/12 | 4h11 |
| IMP(iter #7)      | 0.273                 | 0.274                 | 0.280                 | 0.283                 | 0.291                 | 0.356                 | 88.41 | 0/12 | 4h47 |
| NEPENTHE(iter #1) | 0                     | 0                     | 0.218                 | 0.234                 | 0.240                 | 0.244                 | 89.58 | 2/12 | 1h23 |
| NEPENTHE(iter #2) | 0                     | 0                     | 0.215                 | 0.246                 | 0.251                 | 0.264                 | 89.46 | 2/12 | 2h11 |
| NEPENTHE(iter #3) | 0                     | 0                     | 0                     | 0.227                 | 0.239                 | 0.246                 | 88.89 | 3/12 | 2h59 |
| NEPENTHE(iter #4) | 0                     | 0                     | 0                     | 0.239                 | 0.248                 | 0.252                 | 88.94 | 3/12 | 3h47 |
| NEPENTHE(iter #5) | 0                     | 0                     | 0                     | 0.192                 | 0.263                 | 0.279                 | 89.38 | 3/12 | 4h35 |
| NEPENTHE(iter #6) | 0                     | 0                     | 0                     | 0                     | 0.280                 | 0.299                 | 88.21 | 3/12 | 5h23 |
| NEPENTHE(iter #7) | 0                     | 0                     | 0                     | 0                     | 0.251                 | 0.314                 | 88.69 | 4/12 | 6h11 |

Table 29: Test performance (top-1), bottom six layer’s entropies  $\hat{\mathcal{H}}$  and the number of removed layers (Rem.) for RoBERTa on QNLI.

| Approach          | $\hat{\mathcal{H}}_1$ | $\hat{\mathcal{H}}_2$ | $\hat{\mathcal{H}}_3$ | $\hat{\mathcal{H}}_4$ | $\hat{\mathcal{H}}_5$ | $\hat{\mathcal{H}}_6$ | top-1 | Rem. | Time |
|-------------------|-----------------------|-----------------------|-----------------------|-----------------------|-----------------------|-----------------------|-------|------|------|
| Dense model       | 0.190                 | 0.201                 | 0.210                 | 0.235                 | 0.275                 | 0.303                 | 92.18 | 0/12 | 0h35 |
| IMP(iter #1)      | 0.198                 | 0.214                 | 0.215                 | 0.260                 | 0.271                 | 0.276                 | 92.07 | 0/12 | 1h10 |
| IMP(iter #2)      | 0.205                 | 0.212                 | 0.255                 | 0.263                 | 0.300                 | 0.325                 | 92.07 | 0/12 | 1h45 |
| IMP(iter #3)      | 0.216                 | 0.223                 | 0.265                 | 0.266                 | 0.325                 | 0.334                 | 91.56 | 0/12 | 2h21 |
| IMP(iter #4)      | 0.227                 | 0.234                 | 0.265                 | 0.278                 | 0.343                 | 0.383                 | 91.65 | 0/12 | 2h56 |
| IMP(iter #5)      | 0.227                 | 0.255                 | 0.268                 | 0.321                 | 0.379                 | 0.380                 | 91.51 | 0/12 | 3h31 |
| IMP(iter #6)      | 0.239                 | 0.259                 | 0.261                 | 0.313                 | 0.368                 | 0.386                 | 90.19 | 0/12 | 4h06 |
| IMP(iter #7)      | 0.248                 | 0.254                 | 0.300                 | 0.346                 | 0.393                 | 0.420                 | 90.08 | 0/12 | 4h41 |
| NEPENTHE(iter #1) | 0.001                 | 0.001                 | 0.230                 | 0.274                 | 0.426                 | 0.475                 | 88.36 | 0/12 | 1h22 |
| NEPENTHE(iter #2) | 0                     | 0                     | 0.001                 | 0.028                 | 0.031                 | 0.487                 | 87.41 | 2/12 | 2h09 |
| NEPENTHE(iter #3) | 0                     | 0                     | 0.001                 | 0.001                 | 0.003                 | 0.322                 | 86.43 | 2/12 | 2h56 |
| NEPENTHE(iter #4) | 0                     | 0                     | 0                     | 0.001                 | 0.001                 | 0.023                 | 87.26 | 3/12 | 3h43 |
| NEPENTHE(iter #5) | 0                     | 0                     | 0                     | 0.000                 | 0.001                 | 0.017                 | 86.03 | 3/12 | 4h30 |
| NEPENTHE(iter #6) | 0                     | 0                     | 0                     | 0.001                 | 0.001                 | 0.006                 | 85.21 | 3/12 | 5h17 |
| NEPENTHE(iter #7) | 0                     | 0                     | 0                     | 0                     | 0                     | 0                     | 84.37 | 6/12 | 6h04 |

Table 30: Test performance (top-1), bottom six layer’s entropies  $\hat{\mathcal{H}}$  and the number of removed layers (Rem.) for BERT on RTE.

| Approach          | $\hat{\mathcal{H}}_1$ | $\hat{\mathcal{H}}_2$ | $\hat{\mathcal{H}}_3$ | $\hat{\mathcal{H}}_4$ | $\hat{\mathcal{H}}_5$ | $\hat{\mathcal{H}}_6$ | top-1 | Rem. | Time |
|-------------------|-----------------------|-----------------------|-----------------------|-----------------------|-----------------------|-----------------------|-------|------|------|
| Dense model       | 0.211                 | 0.216                 | 0.233                 | 0.242                 | 0.252                 | 0.261                 | 61.01 | 0/12 | 0h02 |
| IMP(iter #1)      | 0.224                 | 0.225                 | 0.237                 | 0.250                 | 0.260                 | 0.276                 | 55.60 | 0/12 | 0h03 |
| IMP(iter #2)      | 0.243                 | 0.244                 | 0.245                 | 0.274                 | 0.288                 | 0.294                 | 62.09 | 0/12 | 0h04 |
| IMP(iter #3)      | 0.258                 | 0.263                 | 0.279                 | 0.286                 | 0.309                 | 0.344                 | 59.21 | 0/12 | 0h05 |
| IMP(iter #4)      | 0.275                 | 0.282                 | 0.321                 | 0.326                 | 0.342                 | 0.386                 | 58.84 | 0/12 | 0h06 |
| IMP(iter #5)      | 0.287                 | 0.293                 | 0.328                 | 0.366                 | 0.369                 | 0.397                 | 58.48 | 0/12 | 0h07 |
| IMP(iter #6)      | 0.303                 | 0.313                 | 0.342                 | 0.388                 | 0.403                 | 0.409                 | 59.21 | 0/12 | 0h08 |
| IMP(iter #7)      | 0.335                 | 0.343                 | 0.370                 | 0.374                 | 0.432                 | 0.451                 | 57.76 | 0/12 | 0h09 |
| NEPENTHE(iter #1) | 0.204                 | 0.223                 | 0.230                 | 0.233                 | 0.244                 | 0.260                 | 57.04 | 0/12 | 0h03 |
| NEPENTHE(iter #2) | 0.001                 | 0.153                 | 0.173                 | 0.181                 | 0.264                 | 0.280                 | 52.71 | 0/12 | 0h04 |
| NEPENTHE(iter #3) | 0                     | 0.001                 | 0.201                 | 0.283                 | 0.298                 | 0.311                 | 54.87 | 1/12 | 0h05 |
| NEPENTHE(iter #4) | 0                     | 0                     | 0                     | 0.246                 | 0.258                 | 0.266                 | 53.43 | 3/12 | 0h06 |
| NEPENTHE(iter #5) | 0                     | 0                     | 0                     | 0.007                 | 0.287                 | 0.296                 | 56.32 | 3/12 | 0h07 |
| NEPENTHE(iter #6) | 0                     | 0                     | 0                     | 0.022                 | 0.296                 | 0.309                 | 54.87 | 3/12 | 0h08 |
| NEPENTHE(iter #7) | 0                     | 0                     | 0                     | 0.008                 | 0.327                 | 0.339                 | 53.79 | 3/12 | 0h09 |

Table 31: Test performance (top-1), bottom six layer’s entropies  $\hat{\mathcal{H}}$  and the number of removed layers (Rem.) for RoBERTa on RTE.

| Approach          | $\hat{\mathcal{H}}_1$ | $\hat{\mathcal{H}}_2$ | $\hat{\mathcal{H}}_3$ | $\hat{\mathcal{H}}_4$ | $\hat{\mathcal{H}}_5$ | $\hat{\mathcal{H}}_6$ | top-1  | Rem. | Time |
|-------------------|-----------------------|-----------------------|-----------------------|-----------------------|-----------------------|-----------------------|--------|------|------|
| Dense model       | 0.236                 | 0.242                 | 0.263                 | 0.292                 | 0.302                 | 0.303                 | 66,787 | 0/12 | 0h02 |
| IMP(iter #1)      | 0.241                 | 0.243                 | 0.282                 | 0.296                 | 0.314                 | 0.321                 | 72.56  | 0/12 | 0h03 |
| IMP(iter #2)      | 0.253                 | 0.256                 | 0.296                 | 0.341                 | 0.352                 | 0.385                 | 72.92  | 0/12 | 0h04 |
| IMP(iter #3)      | 0.249                 | 0.293                 | 0.304                 | 0.376                 | 0.401                 | 0.409                 | 66.06  | 0/12 | 0h05 |
| IMP(iter #4)      | 0.254                 | 0.291                 | 0.326                 | 0.387                 | 0.434                 | 0.435                 | 67.51  | 0/12 | 0h06 |
| IMP(iter #5)      | 0.262                 | 0.291                 | 0.363                 | 0.418                 | 0.459                 | 0.484                 | 63.54  | 0/12 | 0h07 |
| IMP(iter #6)      | 0.285                 | 0.296                 | 0.385                 | 0.426                 | 0.465                 | 0.497                 | 64.98  | 0/12 | 0h08 |
| IMP(iter #7)      | 0.297                 | 0.305                 | 0.405                 | 0.445                 | 0.492                 | 0.502                 | 60.29  | 0/12 | 0h09 |
| NEPENTHE(iter #1) | 0.001                 | 0.252                 | 0.263                 | 0.298                 | 0.310                 | 0.325                 | 64.26  | 0/12 | 0h03 |
| NEPENTHE(iter #2) | 0.001                 | 0.271                 | 0.295                 | 0.322                 | 0.347                 | 0.351                 | 68.23  | 0/12 | 0h04 |
| NEPENTHE(iter #3) | 0                     | 0.001                 | 0.265                 | 0.295                 | 0.363                 | 0.380                 | 66.06  | 1/12 | 0h05 |
| NEPENTHE(iter #4) | 0                     | 0                     | 0.326                 | 0.333                 | 0.344                 | 0.349                 | 54.15  | 2/12 | 0h06 |
| NEPENTHE(iter #5) | 0                     | 0                     | 0.263                 | 0.359                 | 0.392                 | 0.399                 | 59.93  | 2/12 | 0h07 |
| NEPENTHE(iter #6) | 0                     | 0                     | 0.001                 | 0.001                 | 0.325                 | 0.387                 | 54.15  | 2/12 | 0h08 |
| NEPENTHE(iter #7) | 0                     | 0                     | 0.001                 | 0.001                 | 0.001                 | 0.390                 | 59.21  | 2/12 | 0h09 |

Table 32: Test performance (top-1), bottom six layer’s entropies  $\hat{\mathcal{H}}$  and the number of removed layers (Rem.) for BERT on SST-2.

| Approach          | $\hat{\mathcal{H}}_1$ | $\hat{\mathcal{H}}_2$ | $\hat{\mathcal{H}}_3$ | $\hat{\mathcal{H}}_4$ | $\hat{\mathcal{H}}_5$ | $\hat{\mathcal{H}}_6$ | top-1 | Rem. | Time |
|-------------------|-----------------------|-----------------------|-----------------------|-----------------------|-----------------------|-----------------------|-------|------|------|
| Dense model       | 0.114                 | 0.122                 | 0.130                 | 0.172                 | 0.178                 | 0.205                 | 92,20 | 0/12 | 0h21 |
| IMP(iter #1)      | 0.119                 | 0.126                 | 0.139                 | 0.190                 | 0.213                 | 0.226                 | 91.63 | 0/12 | 0h41 |
| IMP(iter #2)      | 0.138                 | 0.141                 | 0.161                 | 0.241                 | 0.264                 | 0.267                 | 90.83 | 0/12 | 1h01 |
| IMP(iter #3)      | 0.133                 | 0.144                 | 0.185                 | 0.239                 | 0.280                 | 0.307                 | 90.48 | 0/12 | 1h22 |
| IMP(iter #4)      | 0.142                 | 0.167                 | 0.205                 | 0.251                 | 0.303                 | 0.332                 | 90.37 | 0/12 | 1h43 |
| IMP(iter #5)      | 0.158                 | 0.181                 | 0.219                 | 0.279                 | 0.312                 | 0.376                 | 89.91 | 0/12 | 2h04 |
| IMP(iter #6)      | 0.178                 | 0.215                 | 0.241                 | 0.322                 | 0.361                 | 0.363                 | 88.53 | 0/12 | 2h25 |
| IMP(iter #7)      | 0.187                 | 0.226                 | 0.270                 | 0.365                 | 0.370                 | 0.466                 | 87.96 | 0/12 | 2h46 |
| NEPENTHE(iter #1) | 0.001                 | 0.132                 | 0.137                 | 0.182                 | 0.224                 | 0.229                 | 91.17 | 0/12 | 0h48 |
| NEPENTHE(iter #2) | 0.001                 | 0.001                 | 0.191                 | 0.209                 | 0.238                 | 0.246                 | 89.68 | 0/12 | 1h16 |
| NEPENTHE(iter #3) | 0                     | 0                     | 0                     | 0.193                 | 0.205                 | 0.224                 | 89.00 | 3/12 | 1h44 |
| NEPENTHE(iter #4) | 0                     | 0                     | 0                     | 0.001                 | 0.204                 | 0.243                 | 88.88 | 3/12 | 2h12 |
| NEPENTHE(iter #5) | 0                     | 0                     | 0                     | 0.001                 | 0.228                 | 0.254                 | 87.39 | 3/12 | 3h01 |
| NEPENTHE(iter #6) | 0                     | 0                     | 0                     | 0.001                 | 0.246                 | 0.252                 | 88.76 | 3/12 | 3h29 |
| NEPENTHE(iter #7) | 0                     | 0                     | 0                     | 0.001                 | 0.245                 | 0.253                 | 87.73 | 3/12 | 3h57 |



Table 33: Test performance (top-1), bottom six layer’s entropies  $\hat{\mathcal{H}}$  and the number of removed layers (Rem.) for RoBERTa on SST-2.

| Approach          | $\hat{\mathcal{H}}_1$ | $\hat{\mathcal{H}}_2$ | $\hat{\mathcal{H}}_3$ | $\hat{\mathcal{H}}_4$ | $\hat{\mathcal{H}}_5$ | $\hat{\mathcal{H}}_6$ | top-1 | Rem. | Time |
|-------------------|-----------------------|-----------------------|-----------------------|-----------------------|-----------------------|-----------------------|-------|------|------|
| Dense model       | 0.131                 | 0.145                 | 0.152                 | 0.187                 | 0.192                 | 0.278                 | 92.66 | 0/12 | 0h21 |
| IMP(iter #1)      | 0.129                 | 0.151                 | 0.153                 | 0.189                 | 0.196                 | 0.276                 | 92.32 | 0/12 | 0h41 |
| IMP(iter #2)      | 0.136                 | 0.155                 | 0.156                 | 0.186                 | 0.226                 | 0.266                 | 92.43 | 0/12 | 1h01 |
| IMP(iter #3)      | 0.159                 | 0.173                 | 0.179                 | 0.195                 | 0.234                 | 0.346                 | 93.23 | 0/12 | 1h22 |
| IMP(iter #4)      | 0.178                 | 0.180                 | 0.215                 | 0.227                 | 0.304                 | 0.374                 | 92.66 | 0/12 | 1h43 |
| IMP(iter #5)      | 0.178                 | 0.199                 | 0.253                 | 0.293                 | 0.319                 | 0.419                 | 92.20 | 0/12 | 2h04 |
| IMP(iter #6)      | 0.177                 | 0.208                 | 0.226                 | 0.280                 | 0.323                 | 0.416                 | 91.17 | 0/12 | 2h25 |
| IMP(iter #7)      | 0.174                 | 0.200                 | 0.220                 | 0.285                 | 0.344                 | 0.428                 | 90.83 | 0/12 | 2h46 |
| NEPENTHE(iter #1) | 0.001                 | 0.128                 | 0.160                 | 0.161                 | 0.202                 | 0.255                 | 92.32 | 0/12 | 0h48 |
| NEPENTHE(iter #2) | 0.001                 | 0.001                 | 0.166                 | 0.205                 | 0.216                 | 0.251                 | 92.09 | 0/12 | 1h16 |
| NEPENTHE(iter #3) | 0                     | 0.001                 | 0.162                 | 0.197                 | 0.283                 | 0.322                 | 90.83 | 1/12 | 1h44 |
| NEPENTHE(iter #4) | 0                     | 0                     | 0.191                 | 0.198                 | 0.257                 | 0.267                 | 90.60 | 2/12 | 2h12 |
| NEPENTHE(iter #5) | 0                     | 0                     | 0.191                 | 0.212                 | 0.281                 | 0.345                 | 90.48 | 2/12 | 3h01 |
| NEPENTHE(iter #6) | 0                     | 0                     | 0.001                 | 0.210                 | 0.293                 | 0.378                 | 90.71 | 2/12 | 3h29 |
| NEPENTHE(iter #7) | 0                     | 0                     | 0.001                 | 0.215                 | 0.272                 | 0.275                 | 89.68 | 2/12 | 3h57 |
